# 1 The loader complex Scc2/4 forms co- 2 condensates with DNA as loading sites for 3 cohesin 4

5 Sarah Zernia<sup>1</sup>, Dieter Kamp<sup>1</sup>, Johannes Stigler<sup>1,\*</sup>

6 <sup>1</sup> Gene Center Munich, Ludwig Maximilian University, Feodor-Lynen-Strasse 25, 81377 Munich,  
7 Germany

8 \* corresponding author

9

10 The genome is organized by diverse packaging mechanisms like nucleosome formation, loop extrusion  
11 and phase separation, which all compact DNA in a dynamic manner. Phase separation additionally  
12 drives protein recruitment to condensed DNA sites and thus regulates gene transcription. The cohesin  
13 complex is a key player in chromosomal organization that extrudes loops to connect distant regions of  
14 the genome and ensures sister chromatid cohesion after S-phase. For stable loading onto the DNA and  
15 for activation, cohesin requires the loading complex Scc2/4. As the precise loading mechanism remains  
16 unclear, we investigated whether phase separation might be the initializer of the cohesin recruitment  
17 process. We found that, in absence of cohesin, budding yeast Scc2/4 forms phase separated co-  
18 condensates with DNA, which comprise liquid-like properties shown by droplet shape, fusion ability and  
19 reversibility. We reveal in DNA curtain and optical tweezer experiments that these condensates are built  
20 by DNA bridging and bending through Scc2/4. Importantly, Scc2/4-mediated condensates recruit  
21 cohesin efficiently and increase the stability of the cohesin complex. We conclude that phase separation  
22 properties of Scc2/4 enhance cohesin loading by molecular crowding, which might then provide a  
23 starting point for the recruitment of additional factors and proteins.

24

## 25 Introduction

26 In eukaryotic interphase cells, DNA is folded and condensed to fit into the confines of the nucleus. This  
27 folding needs to be dynamic to allow biochemical reactions like DNA replication, repair, recombination  
28 or transcription to occur. DNA is folded into nucleosomes forming a beads-on-a-string-like structure,  
29 which compacts DNA around sevenfold (Oudet et al., 1975). Different histone modifications furthermore  
30 regulate accessibility of the DNA leading to the less densely packed gene-rich euchromatin and the  
31 more densely packed transcriptional inactive heterochromatin (Y. Kim & Yu, 2020). Additionally, the  
32 chromatin fiber is folded by loop formation into topologically associated domains (TADs), which exhibit  
33 high self-interaction and bring far-distance regions of the genome into close proximity (Dixon et al.,

34 2012; Fudenberg et al., 2016; Pombo & Dillon, 2015). This formation of spatially organized structures  
35 promotes contacts between enhancers and promoters and is tightly linked to gene regulation (Pope et  
36 al., 2014; Szabo et al., 2019).

37 With its apparent ability to extrude loops of DNA, the cohesin complex is one of the key proteins in TAD  
38 formation (Davidson & Peters, 2021; Fudenberg et al., 2017). Furthermore, cohesin establishes sister  
39 chromatid cohesion (Guacci et al., 1997; Michaelis et al., 1997) most likely by simultaneously entrapping  
40 two DNA strands (Haering et al., 2008). To stably load onto DNA, cohesin requires a loader complex,  
41 called Scc2/4 in budding yeast (Ciosk et al., 2000; Collier et al., 2020; Murayama & Uhlmann, 2014).  
42 This heterodimer is shaped like a hook, provides two interaction sites for DNA (Kurokawa & Murayama,  
43 2020) and can clamp cohesin on DNA by interfacing with all cohesin subunits (Chao et al., 2015; Higashi  
44 et al., 2020), which leads to increased lifetime of cohesin on DNA (Gutierrez-Escribano et al., 2019;  
45 Stigler et al., 2016). However, the cohesin-Scc2/4 interaction seems to be relatively transient as Scc2/4  
46 was found to hop between different cohesin complexes (Rhodes et al., 2017) and is counteracted by  
47 Pds5 (Kikuchi et al., 2016; Petela et al., 2018) as well as Wapl (Haarhuis et al., 2017). Besides simple  
48 DNA clamping, Scc2/4 can stimulate the ATPase function of cohesin's head domains leading to ATP  
49 hydrolysis, which is necessary for DNA entrapment inside the cohesin ring (Çamdere et al., 2015;  
50 Murayama & Uhlmann, 2014; Petela et al., 2018). Recently, it was found that Scc2/4 can bind to  
51 different sites of the cohesin ring, dependent on ATP, suggesting a two-step loading mechanism  
52 initialized by ATP-independent binding at the hinge region followed by a transition towards the ATPase  
53 head domains (Bauer et al., 2021). However, it remains unclear what initializes and drives the loading  
54 process.

55 Real-time single-molecule experiments have revealed that cohesin forms both DNA loops (Davidson et  
56 al., 2019; Y. Kim et al., 2019) and trans-tethers of DNA (Gutierrez-Escribano et al., 2019), exclusively  
57 in the presence of Scc2/4. Additionally, these experiments have shown that cohesin can unspecifically  
58 compact DNA (Gutierrez-Escribano et al., 2019), even across nucleosomes (Y. Kim et al., 2019), which  
59 is caused by the formation of large protein-DNA-co-condensates with liquid-like properties (Ryu et al.,  
60 2021). Phase separation was shown before to be an important mechanism in genome organization as  
61 it forms regions of increased protein and DNA concentration to facilitate for example gene transcription  
62 activation or repression (Boehning et al., 2018; Boija et al., 2018; Kent et al., 2020; Larson et al., 2017;  
63 Sabari et al., 2018; Strom et al., 2017). Furthermore, other DNA-binding proteins like HP1 $\alpha$  (Keenen et  
64 al., 2020) and FUS (Zuo et al., 2021) were previously found to compact DNA by phase separation in a  
65 comparable fashion.

66 The requirement of Scc2/4 for the formation of cohesin-DNA co-condensates raises the question  
67 whether phase separation is not only an essential process for DNA organization but could also  
68 contribute to the cohesin loading process. To our surprise, we found that Scc2/4 alone is able to phase  
69 separate on DNA curtains and can form microscopic co-condensates with DNA in a concentration-  
70 dependent manner. We characterized these condensates in terms of preconditions, stability,  
71 reversibility and dynamics using DNA curtains and optical tweezers and found that Scc2/4 serves as a  
72 DNA bridging factor. Finally, we document preferred cohesin loading at Scc2/4-DNA-co-condensates

73 and higher cohesin stability when it is loaded at these sites, suggesting a loading mechanism primed  
74 by phase separation.

## 75 Results

### 76 The cohesin loader Scc2/4 connects and compacts DNA molecules

77 To visualize the effects of the cohesin loader Scc2/4 on DNA, we immobilized ~48.5 kbp dsDNA  
78 molecules derived from bacteriophage lambda to a lipid bilayer in a flow chamber that allowed us to  
79 exchange buffer components (see **Fig. S1A**). The YOYO-1-stained DNA molecules could diffuse freely  
80 in the absence of buffer flow (**Fig. 1A**). Upon injection of 8 nM Scc2/4, we observed the slow formation  
81 of puncta on the surface (**Fig. 1A**) that increased in fluorescence and compacted in size over time  
82 (**Fig. S1B,C**). The formation was strictly dependent on the presence of Scc2/4. Intrigued by this, to our  
83 knowledge, previously undescribed coagulation of DNA into clustered condensates by Scc2/4, we  
84 decided to characterize the properties and consequences of this phenomenon in more detail.

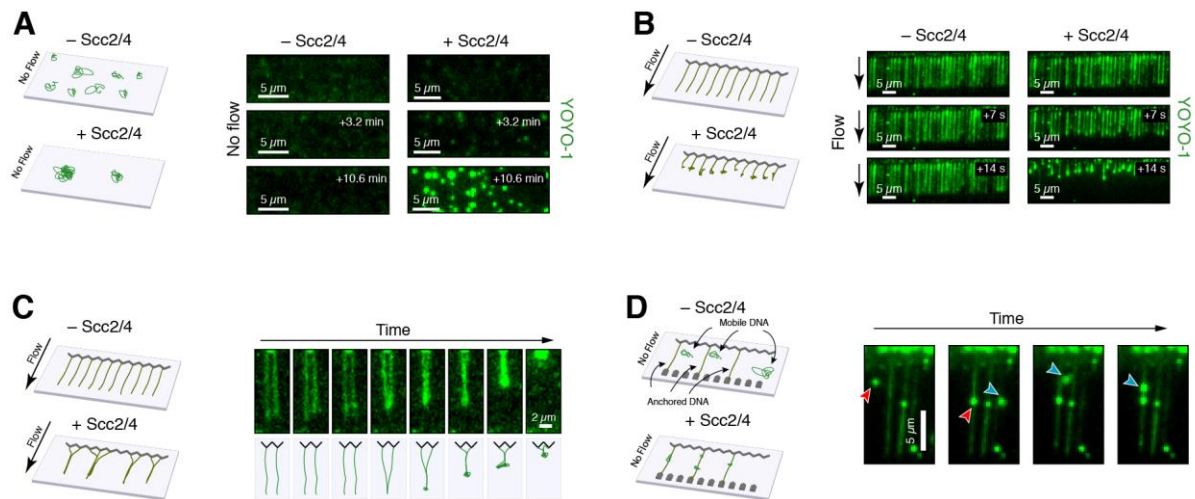

85 **Figure 1.** The cohesin loader Scc2/4 condenses and compacts DNA. (A) Diffusing DNA molecules, tethered to a  
86 lipid bilayer, form condensates after addition of 8 nM Scc2/4. (B) DNA curtains assay of flow-stretched DNA.  
87 Addition of 100 nM Scc2/4 leads to rapid compaction. (C) Braiding between neighboring flow-stretched DNA  
88 strands after Scc2/4 addition. (D) Mobile lipid-anchored DNA molecules (red and blue arrows) attach to double-  
89 tethered DNA molecules after Scc2/4 addition in the absence of flow.

91 Thus, we used single-tethered DNA curtains (Greene et al., 2010), where lipid-attached lambda DNA  
92 is flow-stretched across nanofabricated barriers allowing the investigation of multiple DNA molecules in  
93 an array format (**Fig. 1B**). While flow-stretched DNA remained at full length in the absence of Scc2/4,  
94 we observed rapid shortening and compaction of DNA upon the injection of 100 nM Scc2/4 (**Fig. 1B**).  
95 In a similar setting, we also observed Scc2/4-dependent braiding of adjacent DNA molecules, which  
96 typically started from the free end, followed by compaction (**Fig. 1C**), indicating that Scc2/4-mediated  
97 interactions led to both the coagulation of DNA molecules in trans as well as in cis. This protein-  
98 dependent formation of DNA clusters and tethering in trans was also apparent in double-tethered DNA

99 curtains, where we observed an Scc2/4-dependent recruitment of mobile lipid-anchored DNA molecules  
 100 (red and blue arrows in **Fig. 1D**) to stretched surface-anchored DNA molecules.

101 **Large-scale co-condensation of Scc2/4 with DNA occurs at physiological conditions**

102 Co-condensation of nucleic acids with proteins has mainly been described and observed by the  
 103 formation of macroscopic phase-separated droplets in solution (Keenen et al., 2020; Morin et al., 2020;  
 104 Zhou et al., 2019; Zuo et al., 2021). To test whether Scc2/4-DNA co-condensates also form phase-  
 105 separated droplets, we titrated varying concentrations of Scc2/4 to a 30 nM solution of DNA fragments  
 106 of ~2.9 kbp and checked for condensate formation by bright-field microscopy. Strikingly, we observed  
 107 the formation of visible phase-separated droplets in an Scc2/4-concentration-dependent manner, with  
 108 droplets appearing at concentration above 300 nM Scc2/4 (**Fig. 2A**). Note that condensates exclusively  
 109 formed in presence of DNA. We therefore conclude that the observed clustering, coagulation and  
 110 compaction of single DNA molecules is, in fact, co-condensation of Scc2/4 and DNA.

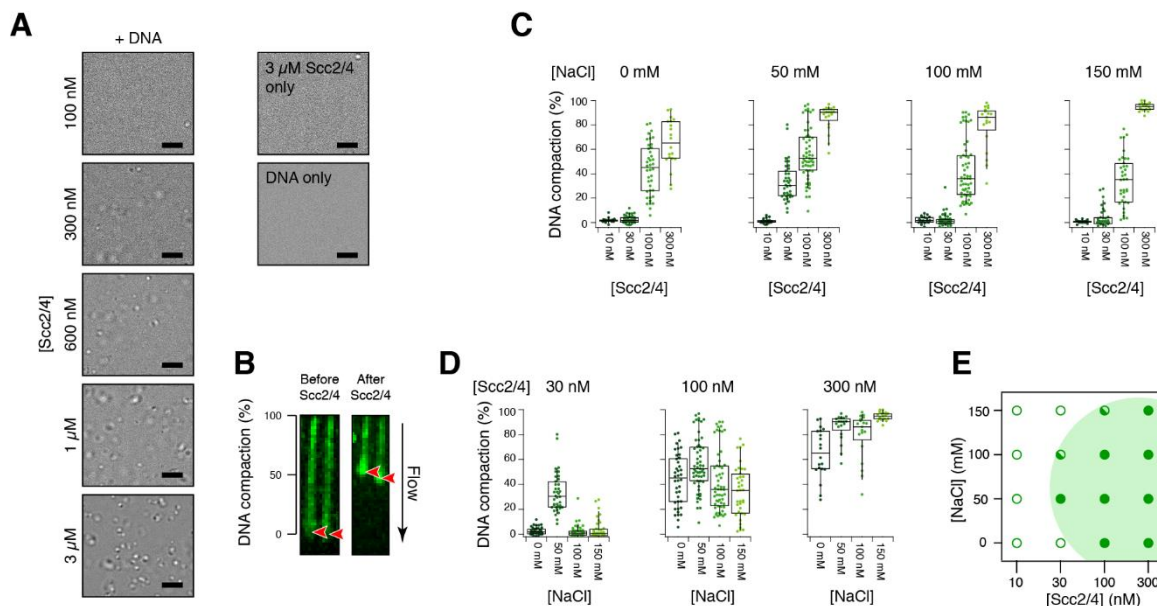

111  
 112 **Figure 2.** Quantification of DNA condensation from single molecule and bulk microscopy experiments. **(A)** Bright-  
 113 field microscopy images of large co-condensates of Scc2/4 and 30 nM 2686 bp DNA fragment. Scale bar: 10  $\mu$ m.  
 114 **(B)** Example of DNA compaction by short pulses of Scc2/4. Red arrows show the free DNA end before and after  
 115 compaction. **(C)** Compaction of single lambda DNA molecules after injection of 50  $\mu$ l pulses of Scc2/4 at the  
 116 indicated concentrations, at varying concentrations of NaCl. For 10 nM and 300 nM of Scc2/4, 19 DNA strands  
 117 were analyzed, for 30 nM and 100 nM, 38 DNA strands were analyzed. **(D)** Rearranged data of **(C)** showing an  
 118 optimal salt concentration for condensation. **(E)** Phase diagram of DNA condensation from single molecule  
 119 experiments. Open circles: no condensation; closed circles: condensation, half-filled circles: condensation occurred  
 120 occasionally. The green area in the background represents the range where condensation was observed, to guide  
 121 the eye.

122 To further explore the range of concentrations that led to the co-condensation of single DNA molecules,  
 123 we returned to DNA curtain experiments. We injected 50  $\mu$ l volumes of varying concentrations of Scc2/4  
 124 into a DNA curtain flow chamber with a flow rate of 0.1 ml/min, which exposed DNA to protein for ~60 s

125 **(Fig. S2A)**. We then determined the degree of DNA compaction by measuring the DNA length before  
126 and after Scc2/4-exposure **(Fig. 2B)**. The compaction was positively correlated with the concentration  
127 of Scc2/4 (see also **Fig. S2B** for examples of DNA compaction). While at 10 nM Scc2/4 the DNA  
128 remained essentially fully extended, 300 nM Scc2/4 compacted the DNA almost completely **(Fig. 2C)**.  
129 We note that the reported Scc2/4 concentrations should be compared only within the context of the  
130 flow-stretched compaction assay. Lower concentrations still may induce condensation on relaxed DNA,  
131 albeit with a longer time constant (e.g. **Fig. 1A**). As protein-DNA co-condensation often relies on  
132 electrostatic interactions (Erdel & Rippe, 2018), we tested the influence of monovalent salt on DNA  
133 compaction by varying the NaCl concentration between 0 mM and 150 mM. However, while compaction  
134 was significantly enhanced at 50 mM NaCl, the overall dependency on salt concentration was weak  
135 **(Fig. 2C,D)**. The data is summarized in the phase diagram of **Fig. 2E**, showing the range of Scc2/4 and  
136 NaCl concentrations where the formation of co-condensates was observed. Importantly, we observed  
137 significant compaction of DNA at near physiological salt (150 mM NaCl) and Scc2/4 concentrations  
138 (~300 nM, (Ho et al., 2018), **Fig. 2C**, right), suggesting that Scc2/4-mediated DNA condensation may  
139 also occur in vivo.

#### 140 Scc2/4 serves as a DNA-bridging factor in condensates

141 Intrigued by the observation that the cohesin loader Scc2/4 can lead to the formation of DNA-DNA  
142 contacts on its own, without the help of the SMC complex cohesin, we next sought to characterize the  
143 mechanism of Scc2/4-mediated DNA condensate formation in greater detail. Condensation of  
144 biomolecules generally requires binding multivalency of the condensate components. Many phase  
145 separating proteins cluster by homo-interactions through intrinsically disordered domains (IDRs), which  
146 form a molten-globule-like state through hydrophobic interactions by excluding water molecules (LLPS,  
147 liquid-liquid phase separation, (Dignon et al., 2020; Erdel & Rippe, 2018; Razin & Ulianov, 2020)).  
148 However, prediction software does not indicate that there are extended IDRs in Scc2/4 (the unstructured  
149 N-terminus of Scc2 is structured upon binding of Scc4, **Fig. S3**). In agreement with this assessment,  
150 washes with 20 % 1,6-hexanediol, a strong disruptor of hydrophobic interactions that has been used  
151 extensively in studies of LLPS (Ladouceur et al., 2020; Ryu et al., 2021), was not able to decondense  
152 Scc2/4-DNA co-condensates **(Fig. 3A)**. In contrast, disruption of electrostatic interactions, such as the  
153 injection of 2M NaCl readily dissolved Scc2/4-DNA co-condensates and returned the DNA back to its  
154 extended form **(Fig. 3B)**. We conclude that the co-condensation mechanism between Scc2/4 and DNA  
155 is likely driven by electrostatic rather than hydrophobic interactions.

156 Contrasting the LLPS model, our findings are instead compatible with the electrostatics-dependent  
157 mechanism of polymer-polymer phase separation (PPPS, (Erdel & Rippe, 2018)), which entails the  
158 bridging of polymers (DNA) through multivalent proteins (Scc2/4). As the PPPS mechanism additionally  
159 predicts that free protein is required to induce the formation of condensates we tested this possibility in  
160 pulsed injection experiments, where we injected short 50  $\mu$ l pulses of 30 nM Scc2/4 onto a dsDNA  
161 curtain that was stretched at a flow rate of 0.1 ml/min. Intriguingly, we found that the condensation of  
162 DNA only proceeded while Scc2/4 was present in the flow cell and stopped after free Scc2/4 had been  
163 washed out **(Fig. 3C)**, resulting in a DNA-Scc2/4 co-condensate at the end of the DNA. We tested if

164 condensates at the end of the DNA are capable of recruiting additional DNA, even in the absence of  
 165 free Scc2/4, by stopping the flow and allowing the DNA to relax. However, we found that in repeated  
 166 flow on/off cycles, the length of the condensed DNA remained the same (**Fig. 3D**). While condensate  
 167 sizes remained stable in absence of free Scc2/4, condensation readily restarted when additional pulses  
 168 of free Scc2/4 were injected into the flow cell (**Fig. 3E**) and existing condensates were then also able  
 169 to fuse (**Fig. S2D**). We also observed merging and coalescence of freely diffusing lipid-bilayer-anchored  
 170 DNA-Scc2/4 condensates in presence of free Scc2/4 (**Fig. 3F**). Hence, we conclude that the formation  
 171 of Scc2/4-mediated DNA condensates requires free Scc2/4 as a DNA bridging factor, which fulfills the  
 172 characteristics of PPPS.

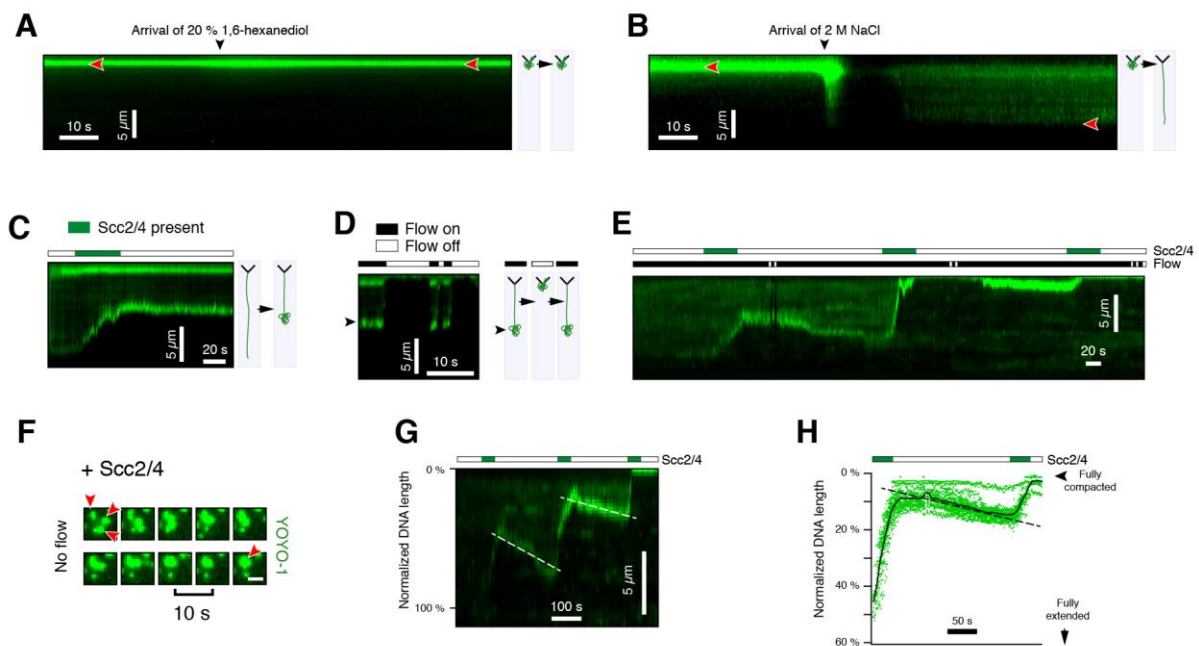

173  
 174 **Figure 3.** DNA condensation and decondensation dynamics by Scc2/4. (**A+B**) Kymograms of an Scc2/4-induced  
 175 condensate on a single DNA molecule, challenged with 20% 1,6-hexanediol (**A**) or 2 M NaCl (**B**). Red arrows  
 176 indicate the free end. (**C**) Kymogram of flow-stretched DNA upon injection of a short pulse of 100 nM Scc2/4. The  
 177 DNA condenses only while protein is in the flow chamber (green bar indicates protein presence). (**D**) In the absence  
 178 of Scc2/4 in the flow chamber, DNA does not condense further when it is allowed to relax by relieving the flow  
 179 tension. (**E**) Kymogram of a multi-pulse experiment. The DNA only condenses while Scc2/4 is in the buffer chamber  
 180 (indicated by green bar). (**F**) Multiple mobile lipid-anchored DNA molecules coagulate to form larger condensates  
 181 while Scc2/4 is present. (**G**) Condensation clusters are reversible. DNA compacts while Scc2/4 is present in the  
 182 buffer chamber and slowly decompacts in the absence of Scc2/4. White lines indicate the end of the DNA molecule.  
 183 (**H**) Decondensation of 52 DNA molecules between pulses of Scc2/4. Black line: mean. Dashed line:  
 184 decondensation trend to guide the eye.

### 185 Condensates are dynamic and reversible

186 A biologically relevant Scc2/4-mediated DNA and chromatin condensation mechanism must be  
 187 reversible. In the previously described experiments we have shown that condensates are static in the  
 188 absence of protein, i.e., they do not condense further. When we exposed partially condensed DNA to  
 189 long washes with buffer in the absence of free Scc2/4, we observed reproducible slow decondensation

190 and concurrent lengthening of DNA (**Fig. 3G**, white dashed line). DNA condensed in the presence of  
191 Scc2/4 and decondensed in its absence, indicating that Scc2/4-mediated DNA condensates are  
192 thermodynamically reversible. In a buffer flow of 0.1 ml/min, the decondensation rate was ~3%/min  
193 (**Fig. 3H**).

#### 194 Condensation is primarily driven by random collisions

195 DNA compaction as a precursor to condensate formation can occur through loop formation by active,  
196 energy-consuming translocation of DNA binding factors (Goloborodko et al., 2016), but also by passive  
197 mechanisms like DNA bridging, bending or wrapping (Johnson et al., 2008). The cohesin loader Scc2/4  
198 has no known nucleotide hydrolysis activity and we found no significant influence of ATP on DNA  
199 compaction by Scc2/4 (**Fig. S2C**), ruling out active processes. We, therefore, further explored the  
200 possible mechanisms for passive DNA compaction. As in previous experiments, we used DNA curtains  
201 and exposed single-tethered, flow-stretched 48.5 kbp DNA molecules to near-physiological  
202 concentrations of Scc2/4. We followed the DNA compaction over time by observing the accumulation  
203 of the YOYO-1 signal. A kymogram of a typical compaction curve for 100 nM Scc2/4 (**Fig. 4A**) shows  
204 the appearance of a bright spot at the free end of the DNA, which gradually moves closer towards the  
205 tethered end. This indicates that the compaction primarily starts at the free end. Intensity profiles along  
206 the DNA at various time points (**Fig. 4B**) also confirm the appearance of a DNA condensate at the free  
207 end. Interestingly, when we measured the fluorescence intensity upstream of the compacting end  
208 (**Fig. 4C**), we found that it remained not constant but increased almost linearly as the DNA compacted  
209 (**Fig. 4D**). This indicates that there is also internal compaction distant from the free end.

210 To more thoroughly distinguish potential mechanisms of compaction from the end (e.g., through the  
211 capture of randomly fluctuating loops) or compaction everywhere (e.g. by bending), we used tracer  
212 proteins to track the position of various positions along the DNA during compaction (H. Kim & Loparo,  
213 2016). Generally, in a scenario where compaction occurs solely from the end, we expect that the inner  
214 tracer molecules are static until they encounter the compacting end (**Fig. 4E**). On the contrary, a  
215 scenario where compaction occurs everywhere predicts movement of internal tracers as soon as the  
216 DNA is exposed to the compacting factor. **Fig. 4F** shows a representative kymogram of the Scc2/4-  
217 mediated compaction of lambda DNA with Qdot-labeled EcoRI-E111Q tracer molecules bound.  
218 Tracking of the tracer molecules then allowed us to follow the compaction path (**Fig. 4G**). To our  
219 surprise, we found that, while our observations primarily corresponded to the scenario of compaction  
220 from the end, the internal tracer proteins also started moving as soon as the DNA is exposed to Scc2/4  
221 (red arrow in **Fig. 4G**, **Fig. S4B**). This indicates that while capture of freely fluctuating DNA loops at the  
222 free end is the primary mechanism for DNA compaction and condensation, there is also a smaller  
223 contribution of internal compaction, perhaps through DNA bending.

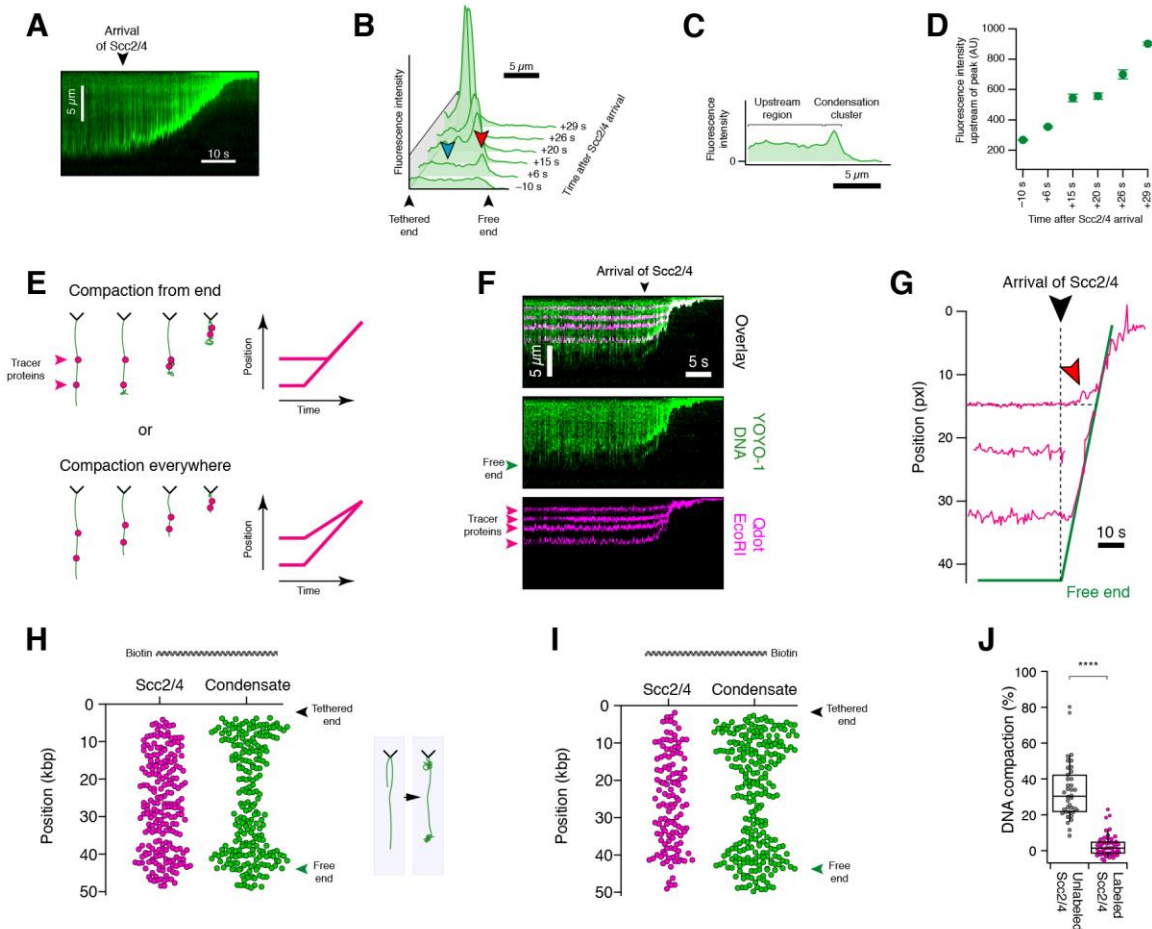

224

225 **Figure 4.** Direction of DNA compaction. **(A)** Kymogram of Scc2/4-mediated DNA condensation shows the  
 226 appearance of a bright spot at the free end. **(B)** YOYO-1 intensity profiles of a single lambda DNA molecule during  
 227 Scc2/4-mediated condensation. Time marks indicate the time after the start of Scc2/4 arrival in the flow cell. Red  
 228 arrow: Condensate at the free end. Blue arrow: Region upstream of condensate. **(C)** YOYO-1 intensity profile along  
 229 a single lambda DNA molecule during Scc2/4-mediated condensation. **(D)** Average YOYO-1 intensity of the region  
 230 upstream of the free end (see blue arrow in **(B)**). **(E)** Models for the condensation of DNA. **(F)** Kymograms of  
 231 Scc2/4-mediated condensation of lambda DNA, which was marked with fluorescently tagged EcoRI-E111Q tracer  
 232 proteins. **(G)** Tracked positions of tracer proteins upon Scc2/4 addition. The red arrow shows movement of an  
 233 internal tracer far away from the condensing end. **(H)** Binding positions of Qdot-tagged Scc2/4 (magenta) show a  
 234 homogenous binding preference across the substrate. Condensation clusters (green) primarily occur at the free  
 235 end as well as close to the barriers. Data points were pooled from two independent experiments. **(I)** Experiment as  
 236 in **(G)**, with DNA that was tethered at the opposite end. Data points were pooled from three independent  
 237 experiments. **(J)** DNA compaction of 30 nM unlabeled or labeled Scc2/4. For unlabeled and labeled protein binding,  
 238 38 and 50 DNA strands were analyzed, respectively. Distribution is according to student's t-test significantly  
 239 different.

240 We further considered the possibility that the movement of internal tracer molecules could also be a  
 241 consequence of altered hydrodynamic properties of the DNA during apparent shortening in flow. To  
 242 address this question, we turned to coarse-grained molecular dynamics simulations where lambda DNA  
 243 is represented by a Rouse model of 160 beads that were connected by segments of ~300 bps in length  
 244 while internal compaction was excluded. After applying flow stretching forces (**Fig. S4C, left**), we



245 modeled the effect of Scc2/4 by introducing an attractive Lennard-Jones-like potential between the  
246 beads (see Methods), which explicitly did not induce a shortening of segments but nevertheless led to  
247 a rapid compaction of the modeled DNA (**Fig. S4C, right**) due to condensation at the free end. In  
248 contrast to DNA curtain experiments, these simulations did not display the movement of internal tracer  
249 molecules until they were encountered by the condensing end. This suggests that the experimentally  
250 observed movement of tracers is not caused by a change in hydrodynamics but indeed by internal  
251 compaction or bending of DNA initiated by Scc2/4 binding.

252 Finally, we asked if end-dependent compaction may be caused by preferred association of Scc2/4 to  
253 free ends. To this end, we Qdot-labeled Scc2/4 and tracked the binding position of Scc2/4 before the  
254 onset of condensation (**Fig. 4H**). While DNA condensates initially formed primarily at the free end, the  
255 binding position of Scc2/4 showed no preference. We obtained the same result when we anchored the  
256 DNA molecule at the opposite end suggesting sequence-independent binding (**Fig. 4I**). In both  
257 orientations we also observed a fraction of condensate clusters close to the tethered end, which we  
258 attribute to the presence of shorter DNA molecules. However, while Qdot-labeled Scc2/4 was clearly  
259 able to bind DNA, labeling had a partially disruptive effect on DNA-compaction (**Fig 4J**), plausibly  
260 through interfering with at least one of Scc2/4's DNA binding sites.

### 261 Scc2/4 compacts DNA by a tension-dependent bridging mechanism

262 To unravel what drives Scc2/4-mediated bridging on DNA, we utilized optical tweezers and first studied  
263 the influence of DNA tension on Scc2/4 interaction. A single lambda DNA molecule was tethered  
264 between two optically trapped beads, which allows force application and measurement in a very  
265 accurate manner. We incubated the DNA with 10 nM of Scc2/4 first in a tensioned (7.5  $\mu\text{m}$  bead  
266 distance) and then in a more relaxed conformation (5  $\mu\text{m}$  bead distance, **Fig. 5A, Fig. S5B**) and found  
267 in both cases a strong gradual increase in force due to protein association to the DNA (**Fig. 5B** magenta  
268 trace, see also **Fig. S5A** for responses of individual tethers). Naked DNA (green) did not show a change  
269 in force, while DNA that was transferred into buffer after protein incubation (black) displayed a slight  
270 decrease in force due to unbinding of protein (**Fig. 5B**). To quantitate and compare the degree of  
271 compaction at different tension, we calculated the apparent contour length of the tethers as a function  
272 of time. Although compaction occurred at both incubation steps, Scc2/4-mediated compaction was  
273 much stronger when DNA was held at 5  $\mu\text{m}$  (**Fig. 5C**), where DNA is more relaxed and can be bridged  
274 much easier (**Fig. 5A**).

275 Next, we wondered whether the condensates can be removed from DNA by increasing forces. We  
276 applied five stretch and relax cycles to the DNA and recorded force-extension curves (FEC). We  
277 observed a Scc2/4-dependent sawtooth pattern, which is a key characteristic of protein-mediated DNA  
278 bridges that are ruptured at increasing forces (**Fig. 5D**). While most bridges could be resolved by  
279 moderate tensions, we also observed bridges that resisted at forces up to  $\sim 65$  pN, where the DNA  
280 undergoes force-induced melting. Note, that broken bridges did not reform during relaxation of the DNA  
281 strand (**Fig. 5D**), but readily re-formed on fully relaxed DNA, as evidenced by the reappearance of the  
282 sawtooth pattern in subsequent cycles (**Fig. S5C**). Additionally, we recognized the absence of the  
283 sawtooth pattern, when DNA was incubated at very high tension (14.4  $\mu\text{m}$  bead distance) and directly

284 stretched (**Fig. 5E**). These results indicate that bridging requires relaxed DNA, but does not necessitate  
 285 the presence of a free DNA end.

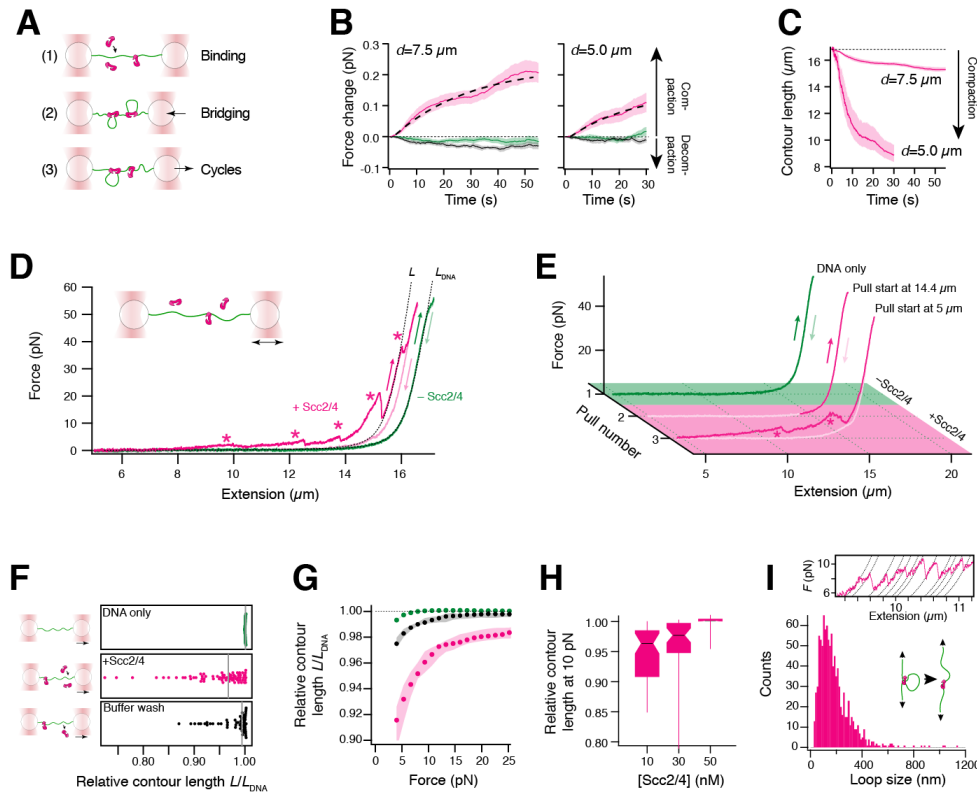

286  
 287 **Figure 5.** Optical tweezers experiments for understanding the DNA coagulation mechanism of Scc2/4. (**A**)  
 288 Schematic representation of the experimental procedure. (**B**) Transient force response of DNA tethers held at the  
 289 indicated distance in flow channels without Scc2/4 (green), with 10 nM Scc2/4 (magenta) or in a buffer channel  
 290 after previous Scc2/4 incubation (black). Colored line represents the mean of 15 tethers, shading represents the  
 291 SEM, dashed line represents an exponential fit. (**C**) Time-dependent reduction of the tether contour length in the  
 292 presence of 10 nM Scc2/4. (**D**) Force-extension curves (FECs) of lambda DNA in the absence (green) and  
 293 presence (magenta) of 10 nM Scc2/4. Darker shades are stretch traces, lighter shades are relaxation traces.  
 294 Dashed lines indicate the expected force response of a full-length DNA or a DNA that is shortened by partial  
 295 compaction, based on an eWLC model. (**E**) Subsequent pulls of lambda DNA that was transferred from the buffer  
 296 channel (green) to the channel with 10 nM Scc2/4 (magenta). The DNA was incubated in the protein channel in an  
 297 extended state (pull 2) or at a lower tension (pull 3). Observed compaction is marked by asterisks. (**F**) Relative  
 298 contour length of DNA stretch-traces from multiple molecules at 10 pN, normalized to the expected contour length  
 299 of lambda DNA. Green: In the absence of Scc2/4, magenta: In the presence of 10 nM Scc2/4, black: In the buffer  
 300 channel, after previous Scc2/4 incubation. Grey lines indicate the median. (**G**) Median relative contour lengths of  
 301 stretch traces at various forces. Shading indicates 68% confidence intervals from bootstrapping. Color code as in  
 302 (**F**). (**H**) Relative contour lengths at 10 pN after incubation at different protein concentrations. Number of analyzed  
 303 tethers 10nM: 15, 30 nM: 10, 50 nM: 13. (**I**) Determination of the length of opened loops from sawtooth features.  
 304 Top: representative stretch FEC with eWLC fits to individual features. Bottom: histogram of loop lengths of 16  
 305 individual DNA tethers incubated with 10 nM Scc2/4.

306 We characterized the observed shortening of the DNA by comparing the relative DNA contour length  
 307 ( $L/L_{DNA}$ , see **Fig. 5F**) of naked DNA with DNA incubated in Scc2/4 and observed clear DNA compaction

308 in presence of Scc2/4, which was reduced to almost naked DNA level when washing the DNA in buffer  
309 after protein incubation (**Fig. 5G**). When looking at individual cycles, we found the strongest compaction  
310 for the first cycle, caused by the prior incubation step, while the other four cycles showed reduced but  
311 constant compaction as proteins constantly bind and unbind (**Fig. S5D**). During the buffer wash,  
312 compaction is reduced in each cycle due to continuous protein unbinding (**Fig. S5D**). We conclude that  
313 DNA compaction by Scc2/4 is reversible and can be removed by buffer washes or mechanical tension.

314 Besides DNA tension, it is likely that also protein concentration influences DNA compaction. To  
315 quantitate the dependency on protein concentration, we recorded FECs at increasing Scc2/4  
316 concentrations and found, surprisingly, that compaction was reduced at 30 nM Scc2/4 and completely  
317 vanished at 50 nM (**Fig. 5H**). Similarly, we also found that, during incubation, higher protein  
318 concentrations counterintuitively resulted in less compaction (**Fig. S5E**). While this finding is puzzling  
319 at first glance, it is compatible with the PPPS model of multivalent Scc2/4 bridging DNA: In the case of  
320 high protein coverage, there are no more freely accessible DNA binding sites and additional bridges  
321 are abrogated, resulting in less DNA compaction.

322 Finally, to quantify the size of DNA loops formed by bridging, we fitted extensible worm-like chain  
323 (eWLC) models to individual rupture events in the sawtooth pattern of FEC and collected all loop sizes  
324 in a histogram (**Fig. 5I**). The mean loop size of  $183 \pm 4$  nm (~540 nt) suggested that DNA is not just  
325 simply wrapped around Scc2/4 but bridged over longer distances.

### 326 Scc2/4-DNA co-condensates are preferred loading sites for cohesin

327 The stark compaction and condensation properties of Scc2/4 raise the possibility that the observed  
328 behavior has direct consequences for Scc2/4's role as a loading factor for cohesin. To address this  
329 question, we performed DNA curtain experiments where we pre-loaded 30 nM Scc2/4 to initiate  
330 condensate formation followed by loading of 20 nM Qdot-labeled tetrameric cohesin (SMC1, SMC3,  
331 SCC1, SCC3) with a continuous flow of 0.1 ml/min (**Fig. 6A**). After washing out all unbound protein, we  
332 observed in ~70% of all cases that cohesin bound directly to Scc2/4-DNA co-condensates while the  
333 other proteins attached to uncompacted regions of the DNA (**Fig. 6B**). Kymograms of the whole binding  
334 process revealed that, apart from direct binding to the condensate or free DNA, some proteins also  
335 initially associated to uncompacted DNA and then slid towards the condensates to stick there (**Fig. 6D**).  
336 When incubating cohesin and Scc2/4 simultaneously for 10 min on DNA curtains we observed cohesin  
337 overwhelmingly enriched at condensates (**Fig. S6A**). This suggests that most cohesins that initially  
338 associated to uncompacted DNA did either dissociate or diffuse towards condensates during  
339 incubation. In contrast, when applying Qdot-labelled cohesin to a non-compacted, Scc2/4-free DNA  
340 curtain (**Fig. S6C**), we observed eight times fewer binding events (**Fig. 6C**). These results show that  
341 cohesin is preferably loaded on DNA via association with Scc2/4-formed condensates and that binding  
342 is strongly enhanced through this process.

343 Furthermore, we tested whether the recruitment observed in this assay constitutes bona fide loading of  
344 cohesin. In vitro loading of cohesin had been tested and investigated by performing washes with high  
345 concentrations of monovalent salt (Gutierrez-Escribano et al., 2019; Minamino et al., 2018; Murayama

346 & Uhlmann, 2014; Ryu et al., 2021). Recapitulating these experiments, we washed the DNA after  
 347 loading with 2M NaCl. As expected, we observed decondensation together with stretching of the DNA  
 348 (**Fig. 6E**). The salt wash removed 79 % of the bound cohesin complexes. However, 21 % resisted the  
 349 high salt conditions, indicating a strong interaction mechanism (**Fig. 6G**). In absence of Scc2/4, high  
 350 salt washes removed the bound cohesin complexes completely (**Fig. 6F,G**) showing that Scc2/4  
 351 effectively promotes the formation of salt-stable cohesin-DNA interactions. Intriguingly, cohesin that had  
 352 loaded at Scc2/4-DNA co-condensates exhibited a significantly higher resistance to salt washes ( $38 \pm$   
 353  $8$  % remaining) than cohesin that had loaded at uncondensed DNA ( $17 \pm 4$  %) (**Fig. 6H**). We conclude  
 354 that Scc2/4-mediated DNA co-condensates serve as preferred sites for stable cohesin loading.

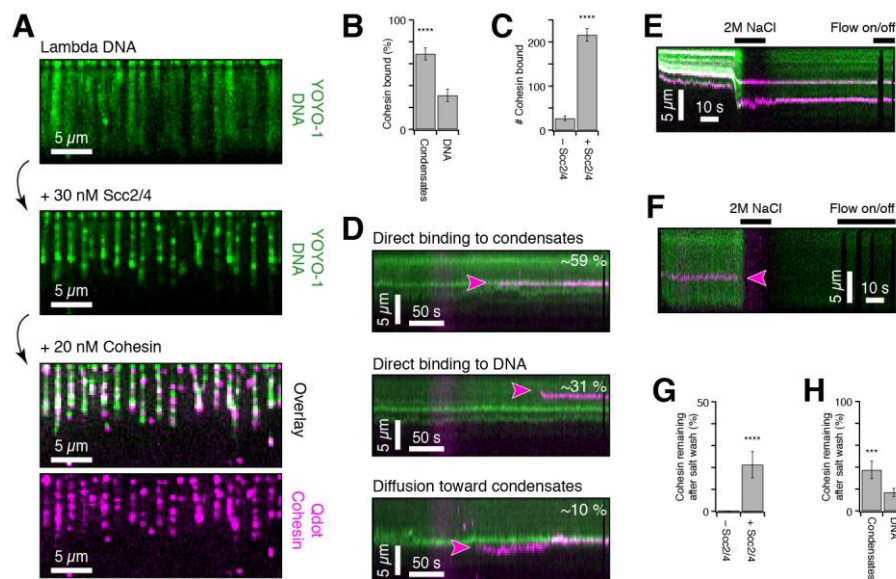

355  
 356 **Figure 6.** Scc2/4-mediated DNA condensates lead to enhanced loading of cohesin. (A) DNA curtain experiment of  
 357 Qdot-labeled cohesin (magenta) on Scc2/4-mediated DNA condensates (green). (B) Ratio of bound cohesin at  
 358 condensates or at uncompact DNA after unbound protein was washed out. (C) Number of bound cohesin in  
 359 absence or presence of Scc2/4. (D) Representative kymograms of cohesin binding directly to condensates, directly  
 360 to uncompact DNA or diffusing towards condensates. (E) Kymogram of 2M NaCl wash after cohesin was loaded  
 361 in presence of Scc2/4. Cohesin remains bound while DNA is decompact and clusters are dissolved. (F)  
 362 Kymogram of 2M NaCl wash after cohesin was loaded in absence of Scc2/4. Cohesin cannot stay bound on DNA  
 363 during salt wash. (G) Proportion of cohesin molecules remaining on the DNA after 2 M NaCl wash when loaded  
 364 with or without Scc2/4. (H) Proportion of cohesin molecules remaining on the DNA after 2 M NaCl wash when  
 365 loaded in presence of Scc2/4 at condensates or uncompact DNA. (B+C+G+H) Data was pooled from three  
 366 independent experiments, error bars represent the standard error of a binomial distribution. Significance was  
 367 calculated by a z-test.

## 368 Discussion

369 Here, we have described and characterized a previously unreported property of the cohesin loader  
 370 Scc2/4. While co-condensation of Scc2/4 with DNA may be unexpected, phase separation phenomena  
 371 in the context of cellular and nuclear organization are, in fact, common. In the past years it has emerged  
 372 that phase separation is an important feature to organize the crowded interior of cells, to separate

373 counteracting reactants but also to pool interacting molecules (Erdel & Rippe, 2018). Besides the  
374 formation of distinct phase separated bodies, like stress granules, p-bodies or nucleoli (Verdile et al.,  
375 2019), phase separation also promotes chromatin organization (Gallego et al., 2020; Larson et al.,  
376 2017; Strom et al., 2017) and regulation of processes like transcription (Boehning et al., 2018; Boija et  
377 al., 2018; Kent et al., 2020; Sabari et al., 2018; Wei et al., 2020), replication (Parker et al., 2019) or  
378 DNA repair (Kilic et al., 2019). In fact, the cohesin complex phase separates in presence of the loader  
379 protein Scc2/4 (Ryu et al., 2021). Furthermore, ParB, a bacterial SMC loading factor (Minnen et al.,  
380 2011; Sullivan et al., 2009), undergoes phase separation in vivo (Broedersz et al., 2014; Guilhas et al.,  
381 2020) and in vitro (Madariaga-Marcos et al., 2019) suggesting that condensate formation might be a  
382 general feature of SMC loading proteins.

### 383 Phase separation vs. aggregation

384 In this work, we have demonstrated that the loading complex Scc2/4 is able to bridge and compact DNA  
385 into protein-DNA co-condensates independently of cohesin. Previous studies did not investigate full-  
386 length Scc2/4 alone and have used protein concentrations in the low nanomolar range leading to only  
387 rarely observed protein clusters, which were often attributed to aggregation or impurities (Davidson et  
388 al., 2019; Gutierrez-Escribano et al., 2019; Y. Kim et al., 2019). Our findings extend to physiological  
389 protein and salt concentrations (300 nM Scc2/4 (Ho et al., 2018), 150 mM NaCl), strongly suggesting  
390 that the observed phenomenon is also relevant in vivo. The presented results are compatible with well-  
391 known hallmarks of phase separation (Mitrea et al., 2018), as the condensates exhibit liquid-like  
392 behavior represented by droplet formation in bulk (**Fig. 2A**), fusibility in the presence of protein (**Fig.**  
393 **3F, Fig. S2D**) and decomposition of condensates caused by exchange with the environment (**Fig. 3G**).  
394 Condensate dynamics and reversibility also rule out the possibility that condensation may be triggered  
395 by protein aggregation.

### 396 Protein constituents for generating phase separation

397 Many phase separating proteins contain intrinsically disordered regions (IDR) which promote high levels  
398 of self-interaction and crowding (André & Spruijt, 2020) and lead to liquid-liquid phase separation  
399 (LLPS). Scc2/4 lacks IDRs but comprises HEAT-repeats, which were found before to induce phase  
400 separation (Aktar et al., 2019) due to their amphiphilic and very flexible structure (Kappel et al., 2010;  
401 Yoshimura & Hirano, 2016). However, we propose that the observed Scc2/4-DNA co-condensates are  
402 formed by polymer-polymer phase separation (PPPS), where Scc2/4 serves as a multivalent bridging  
403 factor for DNA and does not self-interact. In our droplet experiments, both polymers, DNA and Scc2/4,  
404 are required to form liquid-like droplets (**Fig. 2A**), which corroborates a PPPS-based mechanism. PPPS  
405 has previously been shown for the related SMC loading factor ParB, which bridges DNA by multiple  
406 helix-turn-helix motifs and also does not self-interact (Fisher et al., 2017; T. G. W. Graham et al., 2014).  
407 DNA decondensation during salt wash (**Fig. 3B**) revealed that DNA bridging is promoted by electrostatic  
408 rather than hydrophobic interactions (Erdel & Rippe, 2018). Furthermore, we found that free protein is  
409 required for condensate formation and coagulation (**Fig. 3E; Fig. 5G**), as it is driven by the introduction  
410 of new bridging factors until the binding sites are saturated (Erdel & Rippe, 2018). Also other DNA  
411 compacting proteins require free protein in solution for DNA condensation, which is thought to facilitate

412 dynamic and flexible DNA binding and therefore influence gene regulation (J. S. Graham et al., 2011).  
413 In contrast to that, the LLPS forming protein HP1 $\alpha$  continuously compacts DNA in absence of free  
414 protein, only triggered by pre-bound HP1 $\alpha$  (Keenen et al., 2020). DNA compaction frequently occurs in  
415 DNA curtain experiments at Scc2/4 concentrations higher than 10 nM (**Fig. 2C**), which suggests that  
416 the DNA needs to be coated with protein to a certain extent to induce condensate formation through a  
417 coil-globule transition (Lappala & Terentjev, 2013; Quail et al., 2020; Shendruk et al., 2015). However,  
418 our optical tweezer data show no linear relation between protein amount and compaction behavior as  
419 higher concentrations prevent compaction dramatically (**Fig. 5H**). This might be explained by a  
420 reduction of possible DNA bridging points when DNA is completely coated by Scc2/4 at concentrations  
421 higher than 10 nM and confirms the existence of at least two independent DNA binding sites in Scc2/4  
422 (Kurokawa & Murayama, 2020). HU protein was shown before to exhibit a comparable behavior  
423 compacting DNA at low concentration by bending and reextending DNA at higher concentrations due  
424 to protein filament formation (Song et al., 2016). The discrepancy between critical protein  
425 concentrations for DNA condensation in DNA curtain and optical tweezer experiments might be due to  
426 different incubation procedures as well as different effective DNA to protein ratios in the assays.

#### 427 Bridging vs. bending

428 Besides protein-mediated DNA bridging, DNA compaction can also be caused by DNA bending which  
429 alters DNA flexibility and regulates replication, recombination and gene expression (Dillon & Dorman,  
430 2010; Gruber, 2014). Our optical tweezer experiments clearly show a sawtooth pattern in FECs (**Fig.**  
431 **5D**), which is a known characteristic of DNA looping (Dame et al., 2006) as every rip during DNA  
432 stretching marks a broken protein-DNA bridge. In our DNA curtain experiments, Scc2/4 binds  
433 sequence-independently to the lambda DNA (**Fig. 4H,I**) (Taylor et al., 2015), but nevertheless,  
434 compaction always starts from the free DNA end (**Fig. 4A,B**). This was also reported for other DNA  
435 binding proteins, like HP1 $\alpha$  (Keenen et al., 2020), FUS (Renger et al., 2021) or the transcription factor  
436 Klf4 (Morin et al., 2020) as well as for ParB (T. G. W. Graham et al., 2014) and can be explained by a  
437 preference of these proteins to bridge where tension is lowest and DNA is highly flexible (Baumann et  
438 al., 2000; H. Kim & Loparo, 2016). Optical tweezer experiments confirmed this by increased compaction  
439 at lower tension (**Fig. 5C,E,G**) as well as the fact that condensates do not re-form during DNA relaxation  
440 but only at minimal tension at the beginning of each cycle (**Fig. 5D, Fig. S5C**). All these findings suggest  
441 a clear compaction mechanism driven by bridging. However, our fluorescence intensity (**Fig. 4C**) and  
442 tracer protein studies (**Fig. 4G, Fig. S4C**) suggest also an internal compaction mechanism most likely  
443 caused by DNA bending (Carrivain et al., 2012) probably at the helix-turn-helix motifs (Harrington &  
444 Winicov, 1994). The contribution of both, bridging and bending, to the compaction mechanism was  
445 previously discovered for a bacterial SMC protein (H. Kim & Loparo, 2016). Furthermore, crystal  
446 structures as well as molecular models of cohesin in complex with Scc2/4 suggest that DNA bending  
447 might be an essential step for cohesin loading (Higashi et al., 2020; Shi et al., 2020). However, in optical  
448 tweezer experiments, we could not resolve a reduction in DNA persistence length, which was found to  
449 occur during DNA bending (Farge et al., 2012), as the bridging process dominated FEC appearance.

## 450 Loading sites for cohesin

451 Scc2/4-supported loading of cohesin is more efficient (Stigler et al., 2016) and more stable (Gutierrez-  
452 Escribano et al., 2019) than self-loading due to a topological entrapment of the DNA (Murayama &  
453 Uhlmann, 2014). Hence, we propose that phase separation might trigger this loading, as we and others  
454 could not find condensate formation by cohesin in absence of Scc2/4 (**Fig. S6C**, (Ryu et al., 2021)).  
455 Our DNA curtain experiments clearly show that cohesin is recruited preferably to the condensates (**Fig.**  
456 **6A,B, Fig. S6A**) and that these cohesin molecules are also more resistant to high salt washes (**Fig.**  
457 **6H**), which suggests a topological entrapment of the DNA (Kurokawa & Murayama, 2020) in a manner  
458 that prevents sliding-off the single tethered DNA strand. Interestingly, SMC complexes that load  
459 themselves on DNA like MukB (Kumar et al., 2017) and yeast condensin (Yoshimura et al., 2002) also  
460 form co-condensates with DNA. Hence, our observations strongly suggest that phase separation  
461 induces loading. Protein recruitment to phase separated droplets has also been observed in other  
462 contexts. For example, FET-fusion proteins form condensates with DNA and recruit and activate RNA  
463 polymerase even without the respective promoter (Zuo et al., 2021). Similarly, the DNA repair protein  
464 ATR is recruited to and activated in condensates (Frattini et al., 2021). We therefore propose that also  
465 Scc2/4 condensates do not only bind but also activate cohesin, most likely by stimulating ATPase  
466 function (Murayama & Uhlmann, 2014; Petela et al., 2018).

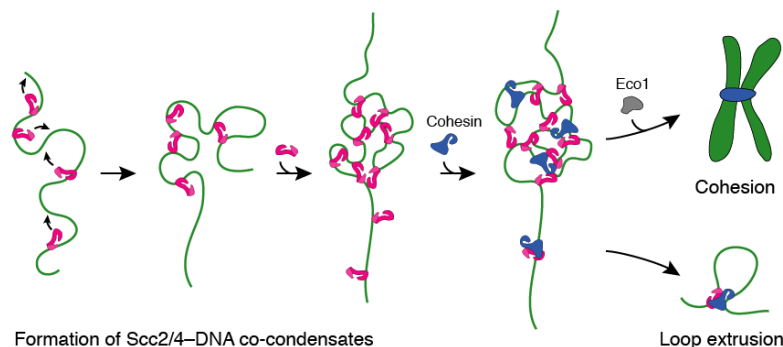

467 **Figure 7.** Schematic representation of DNA compaction mechanism. Scc2/4 binds randomly and bridges DNA  
468 dependent on DNA tension. Free protein promotes the condensation process by providing new interaction points.  
469 Cohesin is preferably recruited to the condensates creating a crowded environment which facilitates the recruitment  
470 of other proteins like Eco1 and finally enables sister chromatid cohesion. Cohesin that is loaded on uncompactd  
471 DNA might induce loop extrusion.

## 473 Ideas and Speculation

474 There are indications that TAD formation and phase separation are counteracting processes (Y. Kim &  
475 Yu, 2020), raising the question whether the loading of cohesin at Scc2/4-mediated DNA-condensates  
476 determines whether cohesin promotes loop extrusion or sister chromatid cohesion. As cohesin  
477 degradation *in vivo* leads to the loss of all DNA loops but not of the condensation-mediated  
478 compartmentalization of chromatin (Rao et al., 2017), it is likely that phase separation does not cause  
479 loop extrusion but both processes co-exist. Furthermore, TAD formation clearly depends on ATP and  
480 is hence an active process (Gutierrez-Escribano et al., 2019; Y. Kim et al., 2019), while phase  
481 separation can organize DNA without energy consumption (Ryu et al., 2021). Sister chromatid

482 cohesion, in contrast, is known to start at replication forks, a very crowded environment, where most  
483 likely multiple cohesins are required to resist strong tension (Skibbens, 2000; Zhang et al., 2008). It is  
484 possible that loading at condensates sets a starting point to accumulate cohesin and recruit other  
485 factors that are required for cohesion maintenance (**Figure 7**). An interesting candidate for such a factor  
486 is the cohesin acetylase Eco1, which was previously shown to be recruitable by DNA-protein-co-  
487 condensates in other contexts (Zuilkoski & Skibbens, 2020). It is possible that Scc2/4 is exchanged by  
488 these factors within the condensates once its task is fulfilled as it is known that Scc2/4 is not required  
489 for cohesion maintenance (Srinivasan et al., 2019). Future studies need to reveal if and how other  
490 downstream protein factors are recruited to the condensates and how interchangeable their  
491 composition is. Nevertheless, our results provide new insights into the properties and the formation  
492 mechanisms of protein-DNA co-condensates and prove the power of single-molecule methods to  
493 uncover unexpected features of already well-known protein complexes.

## 494 Methods

### 495 Protein Expression and Purification

496 The *S. cerevisiae* cohesin tetramer (SMC3-SMC1-SCC1-SCC3) and loader complex Scc2/4 were  
497 cloned in multicopy episomal vectors (pRS424-GAL1-10-SMC1-Strep-SM3-GAL7-SCC1-HIS-HA +  
498 pRS426-GAL-Scc3; pRS426-URA3-GAL-SCC2-3xMyc-3xStrepII-SCC4) and transformed into yeast  
499 W303-1a strains. Protein expression and purification was done as described before (Gutierrez-  
500 Escribano et al., 2019). In brief, yeast was cultivated at 30 °C in selected dropout medium supplemented  
501 with 2 % raffinose and 0.05 % glucose to an OD > 0.8, induced by addition of 2 % galactose and grown  
502 for further 20 h at 20 °C. Cells were harvested by centrifugation (4500 rpm, 15 min, 4 °C), washed with  
503 PBS and resuspended in buffer A (25 mM Hepes, pH 7.5, 5 % glycerol, 5 mM β-Mercaptoethanol)  
504 containing 200 mM NaCl (A-200) and protease inhibitor (cOmplete, Sigma-Aldrich, St. Louis, MI). The  
505 cell suspension was frozen dropwise in liquid nitrogen and stored at -80 °C overnight. The frozen yeast  
506 suspension was lysed by freezer mill (SPEX sample prep, Metuchen, NY) and afterwards thawed on  
507 ice. The solution was supplemented with Pierce Universal Nuclease (0.1 µl/ml, Thermo Fisher  
508 Scientific, Waltham, MA) and incubated for 1 h at 4 °C while rotating. After centrifugation (17,000 xg,  
509 30 min, 4 °C) and filtering (0.22 µm, Thermo Fisher Scientific), lysate was purified on a 1 ml Strep Trap  
510 HP (GE Healthcare, Chicago, IL) using the Äkta pure purification system (Cytiva, Marlborough, MA)  
511 and eluted by buffer A-200 containing 5 mM D-desthiobiotin (Thermo Fisher Scientific). Pooled eluate  
512 fractions were adjusted to 150 mM NaCl and purified on a 5 ml HiTrap Heparin column (GE Healthcare)  
513 using a linear gradient from 150 mM NaCl to 1 M NaCl in buffer A. Pooled eluate fractions were  
514 concentrated, adjusted to 300 mM NaCl and purified on a Superose 6 Increase 10/300 GL (GE  
515 Healthcare) using buffer A containing 300 mM NaCl. Eluate was concentrated by 100 kDa Amicon Ultra,  
516 frozen in liquid nitrogen and stored at -80 °C.

517 EcoRI-E111Q mutant was cloned into a pTXB3 vector including an N-terminal 3xFLAG tag and a C-  
518 terminal Intein-CBD purification tag (pTXB3-3xFLAG-EcoRI\_E111Q-Intein-CBD). For expression, the  
519 plasmid was transformed into *E. coli* Rosetta (DE3) competent cells. Bacteria were cultivated at 37 °C



520 in LB medium until OD<sub>600</sub> of 0.6 was reached, followed by induction of expression by addition of 1 mM  
521 IPTG and further shaking at 20 °C for 4 h. Cells were harvested by centrifugation at 4000 rpm for 10  
522 min, resuspended in 20 ml resuspension buffer (20 mM Tris-HCl pH 7.5, 0.1 mM PMSF, 10 % glycerol)  
523 and lysed by sonication. After centrifugation, the supernatant was transferred onto 3 ml of pre-  
524 equilibrated (washing buffer: 20 mM Tris-HCl pH 8.8, 0.5 M NaCl) chitin resin, incubated for 30 min at  
525 4 °C and released by gravity flow. The resin was washed with washing buffer and the protein was  
526 cleaved overnight at 4°C with 10 ml cleavage buffer (20 mM Tris-HCl pH 8.8, 0.5 M NaCl, 50 mM DTT).  
527 The next day, eluate was released and resin was washed with 10 ml washing buffer. Fractions  
528 containing EcoRI-E111Q were pooled, dialyzed at 4 °C overnight against storage buffer (40 mM Tris-  
529 HCl pH 7.5, 300 mM NaCl, 0.1 mM EDTA, 50 % glycerol, 10 mM β-Mercaptoethanol, 0.15 % Tween20)  
530 and stored at -80°C.

### 531 Protein labeling

532 Scc2/4 was labeled by mixing the protein in an equimolar ratio with Qdot 705 Strep Conjugate (Thermo  
533 Fisher Scientific) and incubating for 10 min on ice in BSA buffer (40 mM Tris, pH 7.5, 1 mM MgCl<sub>2</sub>, 1  
534 mg/ml BSA, 1 mM DTT) with 50 mM NaCl. EcoRI-E111Q and cohesin tetramer were labeled with a  
535 similar protocol using the anti-Flag Qdot 705 for EcoRI-E111Q and the anti-HA Qdot 705 for cohesin,  
536 both produced with the SiteClick Qdot 705 antibody labelling kit (Thermo Fisher Scientific) utilizing  
537 monoclonal anti-Flag M2 antibody from mouse (Sigma-Aldrich) and anti-HA high affinity from rat  
538 (Sigma-Aldrich).

### 539 Droplet Microscopy

540 Scc2/4 droplets were imaged on custom-made flow cells using a prism-type total internal reflection  
541 microscope (Nikon Ti2e; Nikon, Minato, Japan) with a 60x objective (CFI P-Apochromat VC 60 x WI,  
542 Nikon) in brightfield mode. For flow cell production, microscopy slides (borosilicate glass, 76x26 mm,  
543 Roth, Karlsruhe, Germany) were equipped with two stripes of parafilm forming a flow channel and  
544 covered with a cover slip (18x18 mm, Roth). Parafilm was melted on a 100 °C hot plate to fix the  
545 assembly leading to a channel of approximately 15 µl volume. Flow cells were pre-incubated with 40 µl  
546 sample buffer (40 mM Tris (pH 7.5), 50 mM NaCl, 1 mM MgCl<sub>2</sub>, 1 mg/ml BSA, 1 mM DTT). Variable  
547 concentrations of Scc2/4 were mixed with 30 nM linearized pUC19 (digested with NdeI restriction  
548 enzyme and purified by ethanol precipitation) and 0.5 mM ATP in sample buffer (20 µl reaction volume).  
549 Protein-DNA mixture was applied to the flow cell and incubated for 5 min. After this, microscopy videos  
550 of appr. 20 frames for each sample were recorded in NIS Elements (Nikon) using an electron multiplying  
551 charge-coupled camera (Andor iXon life, Andor Technology, Belfast, UK) with illumination times of  
552 100 ms and a sample rate of 200 ms. The background signal (buffer only sample) was subtracted from  
553 each video using custom-written software in Igor Pro (WaveMetrics, Lake Oswego, OR). Experiments  
554 were performed at least twice for each condition.

### 555 DNA curtain assay

556 DNA curtains experiments were performed in custom made flow cells produced as described previously  
557 (Greene et al., 2010). In brief, Cr barriers were deposited on fused-silica slides by e-beam lithography.

558 The sample chamber around the barriers was confined by double sided tape and covered with a cover  
559 slip. The flow cell was connected to a microfluidic system containing a syringe pump and two injection  
560 valves by nanoports glued on drilled holes in the fused-silica slide (UQG Optics, Cambridge, UK).  
561 Sample was illuminated with a 488 nm laser (OBIS LX/LS, coherent, Santa Clara, CA) in a prism-type  
562 total internal reflection microscope (Nikon Ti2e) equipped with an electron multiplying charge-coupled  
563 camera (Andor iXon life) with illumination times of 100 ms and a sample rate of 200 ms. Videos were  
564 recorded in NIS Elements (Nikon). For single-tethered DNA curtains, 3'-biotinylated  $\lambda$ -DNA (NEB,  
565 Ipswich, MA) was attached to the pre-added lipid bilayer surface (DOPC, DOPE, DOPE-biotin, Otto  
566 Nordwald, Hamburg, Germany) by biotin-streptavidin-biotin interaction and flow stretched over the Cr  
567 barriers to arrange DNA strands in an array. For flipped DNA experiments, 5'-biotinylated  $\lambda$ -DNA was  
568 used. For double tethered DNA, double modified  $\lambda$ -DNA (3'- biotinylation and 5'- digoxigenation) was  
569 used. After flow stretching of the DNA over the Cr barriers, DNA was anchored to downstream Cr  
570 pedestals by digoxigenin binding protein DIG10.3. All experiments were performed in BSA buffer  
571 supplemented with 0.16 nM YOYO-1. Different concentrations of Scc2/4 were diluted in BSA buffer  
572 containing variable amounts of NaCl (0 mM, 50 mM, 100 mM, 150 mM), 0.5 mM ATP, 100  $\mu$ M biotin  
573 and loaded on the DNA curtain using a continuous flow of 0.1 ml/min for 4 min. For all injections, a 50  $\mu$ l  
574 injection loop and 65  $\mu$ l sample volume were used. On double tethered DNA curtains, protein was  
575 loaded with a flow of 0.3 ml/min and incubated on the DNA for 5 min without flow. After this, unbound  
576 protein was flushed out with 0.3 ml/min and remaining protein was documented. The setup for the study  
577 of the condensation of mobile surface-tethered DNA was identical to the setup used for DNA curtains,  
578 but videos were recorded away from the chromium barriers.

579 As DNA curtains provide information about multiple DNA molecules at once, sufficient statistics are  
580 already achieved with one measurement. We repeated experiments at least once to rule out  
581 experimental fluctuations and pooled results from different experiments to one data set. For very high  
582 protein concentrations (300 nM) we performed DNA curtains assays only once, as then unspecific  
583 protein binding increased massively preventing any further experiments in the flow cell.

584 For compaction assays with a tracer molecule, 10 nM Qdot-labeled EcoRI-E111Q was supplemented  
585 with 0.5 mM ATP and 100  $\mu$ M biotin in BSA buffer with 50 mM NaCl and loaded on the DNA curtains  
586 with 0.1 ml/min continuous flow. After flushing out all unbound protein, 50 nM unlabeled Scc2/4 was  
587 flushed into the flow cell and compaction was documented. The experiments were performed in  
588 triplicates.

589 For cohesin recruitment experiments, 30 nM unlabeled Scc2/4 was loaded on the curtains first (in BSA  
590 buffer with 50 mM NaCl, 0.5 mM ATP, 100  $\mu$ M biotin), followed by loading of 20 nM Qdot-labeled  
591 cohesin tetramer in the same buffer. For salt washes, 2M NaCl in BSA buffer was applied with a flow  
592 of 0.3 ml/min. The experiments were performed in triplicates.

593 For decondensation, 100 nM Scc2/4 was loaded without laser excitation to prevent photo-crosslinking.  
594 After this, 20 % 1,6-hexanediol (Sigma Aldrich) or 2 M NaCl were loaded on the DNA curtains under  
595 continuous flow with laser excitation and decompaction was documented. Protein injection profiles were  
596 determined by loading blue dextran in BSA buffer on the flow cell and detecting the absorption change  
597 over time in brightfield microscopy.

## 598 Data analysis DNA curtains

599 Videos were analyzed using custom-written software in Igor Pro 8 (WaveMetrics). For determination of  
600 compaction (%), DNA length before and after protein exposure was determined manually from  
601 kymograms. Spot fluorescence over time was determined with the help of a custom-written multi particle  
602 tracker. In cohesin recruitment assays, cohesin binding events as well as the amount of cohesin  
603 molecules remaining at the DNA after salt wash were counted in dependence of Scc2/4 presence.  
604 Cohesin binding events were also counted according to the binding at loader-formed condensates or  
605 at uncompact DNA. Cohesin stability after salt wash was determined for these subspecies separately.  
606 Data was collected in at least two independent experiments and pooled. Standard error was calculated  
607 from binomial distribution and significance was determined by a z-test. P-values were calculated from  
608 z-values assuming a two-tailed hypothesis and a significance level of 0.05 using Social Science  
609 Statistics Web Calculator.

## 610 DNA compaction simulations

611 The DNA was approximated by a Rouse model of 160 beads, connected by Hookean springs with a  
612 length of 100 nm and a spring constant of 0.2 pN/nm. Simulations were run by integrating the time-  
613 discretized Langevin equation of the bead motion with a diffusion coefficient of  $1.1e^9$  nm<sup>2</sup>/s and a time  
614 step of  $1e^{-9}$  s for  $\geq 1e^8$  steps. One bead was fixed in space while the other beads experienced a  
615 stretching force to extend the DNA to a mean end-to-end distance of  $\sim 10$   $\mu$ m, close to experimental  
616 conditions. Condensation conditions that explicitly do not change the equilibrium spacing between the  
617 beads were enabled by an additional Lennard-Jones attraction between beads with an equilibrium  
618 distance of 100 nm and a potential depth of 5  $k_B T$ . The position of every 20th bead was recorded.  
619 Simulations were run in triplicate.

## 620 Optical tweezers

621 Optical tweezer experiments were performed on a dual-trap C-Trap (Lumicks, Amsterdam, The  
622 Netherlands) including a  $\mu$ Flow microfluidics system and a 4-channel glass slide (Type C2, Lumicks).  
623 The system was controlled using the Bluelake software (Lumicks) and custom Python scripts. The first  
624 channel of the slide contained 4.36  $\mu$ m Streptavidin coated polystyrene microspheres (Spherotech,  
625 Fulda, Germany) diluted in sample buffer (40 mM Tris, pH 7.5, 1 mM MgCl<sub>2</sub>, 1 mg/ml BSA, 1 mM DTT,  
626 50 mM NaCl). Here, two microspheres were trapped and the stiffness of the optical traps was calibrated  
627 using Bluelake's built-in thermal calibration method. The microspheres were then moved to the second  
628 channel which contained 3',5'-double-biotinylated  $\lambda$ -DNA in BSA buffer while applying a weak flow. The  
629 mobile optical trap was moved periodically between a bead distance of 5 and 15  $\mu$ m while the force  
630 acting on the trapped microsphere was observed. Upon detection of the characteristic force increase  
631 at increasing bead distances caused by a captured DNA strand, the microspheres were moved to the  
632 third channel, which contained sample buffer supplemented with 0.5 mM ATP. There, tethering of a  
633 single DNA strand was verified by recording a force-extension curve (FEC) and comparing it to an  
634 extensible worm-like-chain (eWLC) model for a single  $\lambda$ -DNA molecule (Wang et al., 1997).  
635 During experiment, the DNA was stretched first to a tension of 0.3 pN and held at this trap separation  
636 for 60 s, then stretched to a tension of 0.05 pN and held at this position for 30 s. After this, force-

637 extension curves were recorded for five stretch-relax cycles. This procedure was performed first in the  
638 buffer channel, then similarly in the protein channel (variable concentrations of Scc2/4 in sample buffer  
639 supplemented with 0.5 mM ATP) and after this again in the buffer channel. For 10 nM Scc2/4, 15 DNA  
640 tethers were analyzed by stretch-relax cycles and data points were pooled. For 30 nM and 50 nM  
641 Scc2/4, 10 and 13 tethers were analyzed, respectively.

## 642 Data analysis optical tweezers

643 Analysis of the recorded incubation steps and force-extension curves was performed using custom-  
644 written code for the IGOR Pro 8 software (WaveMetrics). The effect of incubation of  $\lambda$ -DNA with Scc2/4  
645 was analyzed by comparing the change in the differential force response over time  $\Delta F$  during the  
646 different incubation steps. The constant trap separation  $d$  is composed of the sum of DNA extension  
647  $\xi(F)$  and the bead deflection  $\frac{F}{k_c}$ ,

$$648 \quad d = \xi(F) + \frac{F}{k_c},$$

649 with  $F = F_{t(0)} + \Delta F$ , and  $k_c$  is the trap stiffness.  $F_{t(0)}$  is the initial DNA tension, 0.3 or 0.05 pN for the two  
650 incubation conditions, respectively. Rearranging the equation yields the DNA extension as

$$651 \quad \xi(F) = d - \frac{F}{k_c}.$$

652 Using an inversion of the eWLC model (Wang et al., 1997),  $\xi(F)$  can then be converted into a contour  
653 length  $L_c$  (Mehlich et al., 2020).

654 For each DNA molecule the force-extension curves (FEC) for naked  $\lambda$ -DNA were fitted with an eWLC  
655 model to obtain their persistence length  $L_p$  and contour length  $L_c$ . For all further analysis of the FECs,  
656 the persistence length was then fixed to the value obtained for naked DNA. For every stretch FEC, the  
657 contour length at each force is then obtained by applying an inverted eWLC to each point of the FEC  
658 and binning the result based on the corresponding force value. The contour lengths were then  
659 normalized to the previously obtained contour length of naked DNA.

660 The size of loops formed by Scc2/4 on the DNA was determined using the stretch FECs. Opening of  
661 DNA loops during stretching results in a sawtooth pattern. Fitting an eWLC with fixed persistence length  
662 to the FEC between two opening events, yields the respective contour length for each sawtooth feature.  
663 The loop size is then obtained as the difference in contour length of two consecutive features. Loop  
664 sizes were plotted in a histogram, mean was determined from bootstrapping (error =  $1-\sigma$ ).

## 665 Acknowledgments

666 This work was supported by a DFG Emmy Noether Grant STI673/2-1 and an ERC starting grant  
667 (CHROMDOM: 758124). JS acknowledges the support of the LMU Center for Nanoscience CeNS. We  
668 thank Isabel Aly for providing EcoRI protein.

## 669 Competing interests

670 The authors declare no competing interests.

## 671 References

- 672 Aktar, F., Burudpakdee, C., Polanco, M., Pei, S., Swayne, T. C., Lipke, P. N., & Emtage, L. (2019). The  
673 huntingtin inclusion is a dynamic phase-separated compartment. *Life Science Alliance*, 2(5),  
674 e201900489. <https://doi.org/10.26508/lsa.201900489>
- 675 André, A. A. M., & Spruijt, E. (2020). Liquid–Liquid Phase Separation in Crowded Environments.  
676 *International Journal of Molecular Sciences*, 21(16), 5908.  
677 <https://doi.org/10.3390/ijms21165908>
- 678 Bauer, B. W., Davidson, I. F., Canena, D., Wutz, G., Tang, W., Litos, G., Horn, S., Hinterdorfer, P., &  
679 Peters, J.-M. (2021). Cohesin mediates DNA loop extrusion by a “swing and clamp”  
680 mechanism. *Cell*, 0(0). <https://doi.org/10.1016/j.cell.2021.09.016>
- 681 Baumann, C. G., Bloomfield, V. A., Smith, S. B., Bustamante, C., Wang, M. D., & Block, S. M. (2000).  
682 Stretching of Single Collapsed DNA Molecules. *Biophysical Journal*, 78(4), 1965–1978.  
683 [https://doi.org/10.1016/S0006-3495\(00\)76744-0](https://doi.org/10.1016/S0006-3495(00)76744-0)
- 684 Boehning, M., Dugast-Darzacq, C., Rankovic, M., Hansen, A. S., Yu, T., Marie-Nelly, H., McSwiggen,  
685 D. T., Kokic, G., Dailey, G. M., Cramer, P., Darzacq, X., & Zweckstetter, M. (2018). RNA  
686 polymerase II clustering through carboxy-terminal domain phase separation. *Nature Structural  
687 & Molecular Biology*, 25(9), 833–840. <https://doi.org/10.1038/s41594-018-0112-y>
- 688 Boija, A., Klein, I. A., Sabari, B. R., Dall’Agnese, A., Coffey, E. L., Zamudio, A. V., Li, C. H., Shrinivas,  
689 K., Manteiga, J. C., Hannett, N. M., Abraham, B. J., Afeyan, L. K., Guo, Y. E., Rimel, J. K., Fant,  
690 C. B., Schuijers, J., Lee, T. I., Taatjes, D. J., & Young, R. A. (2018). Transcription Factors  
691 Activate Genes through the Phase-Separation Capacity of Their Activation Domains. *Cell*,  
692 175(7), 1842–1855.e16. <https://doi.org/10.1016/j.cell.2018.10.042>
- 693 Broedersz, C. P., Wang, X., Meir, Y., Loparo, J. J., Rudner, D. Z., & Wingreen, N. S. (2014).  
694 Condensation and localization of the partitioning protein ParB on the bacterial chromosome.  
695 *Proceedings of the National Academy of Sciences*, 111(24), 8809–8814.  
696 <https://doi.org/10.1073/pnas.1402529111>
- 697 Çamdere, G., Guacci, V., Stricklin, J., & Koshland, D. (2015). The ATPases of cohesin interface with  
698 regulators to modulate cohesin-mediated DNA tethering. *ELife*, 4.  
699 <https://doi.org/10.7554/eLife.11315>
- 700 Carrivain, P., Cournac, A., Lavelle, C., Lesne, A., Mozziconacci, J., Paillusson, F., Signon, L., Victor,  
701 J.-M., & Barbi, M. (2012). Electrostatics of DNA compaction in viruses, bacteria and eukaryotes:  
702 Functional insights and evolutionary perspective. *Soft Matter*, 8(36), 9285.  
703 <https://doi.org/10.1039/c2sm25789k>
- 704 Chao, W. C. H., Murayama, Y., Muñoz, S., Costa, A., Uhlmann, F., & Singleton, M. R. (2015). Structural  
705 Studies Reveal the Functional Modularity of the Scc2-Scc4 Cohesin Loader. *Cell Reports*,  
706 12(5), 719–725. <https://doi.org/10.1016/j.celrep.2015.06.071>

- 707 Chao, W. C. H., Murayama, Y., Muñoz, S., Jones, A. W., Wade, B. O., Purkiss, A. G., Hu, X.-W., Borg,  
708 A., Snijders, A. P., Uhlmann, F., & Singleton, M. R. (2017). Structure of the cohesin loader  
709 Scc2. *Nature Communications*, 8(1), 13952. <https://doi.org/10.1038/ncomms13952>
- 710 Ciosk, R., Shirayama, M., Shevchenko, A., Tanaka, T., Toth, A., Shevchenko, A., & Nasmyth, K. (2000).  
711 Cohesin's Binding to Chromosomes Depends on a Separate Complex Consisting of Scc2 and  
712 Scc4 Proteins. *Molecular Cell*, 5(2), 243–254. [https://doi.org/10.1016/S1097-2765\(00\)80420-7](https://doi.org/10.1016/S1097-2765(00)80420-7)
- 713 Collier, J. E., Lee, B.-G., Roig, M. B., Yatskevich, S., Petela, N. J., Metson, J., Voulgaris, M.,  
714 Llamazares, A. G., Löwe, J., & Nasmyth, K. A. (2020). ATP dependent DNA transport within  
715 cohesin: Scc2 clamps DNA on top of engaged heads while Scc3 promotes entrapment within  
716 the SMC-kleisin ring. *BioRxiv*, 2020.06.03.132233. <https://doi.org/10.1101/2020.06.03.132233>
- 717 Dame, R. T., Noom, M. C., & Wuite, G. J. L. (2006). Bacterial chromatin organization by H-NS protein  
718 unravelled using dual DNA manipulation. *Nature*, 444(7117), 387–390.  
719 <https://doi.org/10.1038/nature05283>
- 720 Davidson, I. F., Bauer, B., Goetz, D., Tang, W., Wutz, G., & Peters, J.-M. (2019). DNA loop extrusion  
721 by human cohesin. *Science*, 366(6471), 1338–1345. <https://doi.org/10.1126/science.aaz3418>
- 722 Davidson, I. F., & Peters, J.-M. (2021). Genome folding through loop extrusion by SMC complexes.  
723 *Nature Reviews Molecular Cell Biology*, 22(7), 445–464. [https://doi.org/10.1038/s41580-021-](https://doi.org/10.1038/s41580-021-00349-7)  
724 [00349-7](https://doi.org/10.1038/s41580-021-00349-7)
- 725 Dignon, G. L., Best, R. B., & Mittal, J. (2020). Biomolecular Phase Separation: From Molecular Driving  
726 Forces to Macroscopic Properties. *Annual Review of Physical Chemistry*, 71(1), 53–75.  
727 <https://doi.org/10.1146/annurev-physchem-071819-113553>
- 728 Dillon, S. C., & Dorman, C. J. (2010). Bacterial nucleoid-associated proteins, nucleoid structure and  
729 gene expression. *Nature Reviews Microbiology*, 8(3), 185–195.  
730 <https://doi.org/10.1038/nrmicro2261>
- 731 Dixon, J. R., Selvaraj, S., Yue, F., Kim, A., Li, Y., Shen, Y., Hu, M., Liu, J. S., & Ren, B. (2012).  
732 Topological domains in mammalian genomes identified by analysis of chromatin interactions.  
733 *Nature*, 485(7398), 376–380. <https://doi.org/10.1038/nature11082>
- 734 Erdel, F., & Rippe, K. (2018). Formation of Chromatin Subcompartments by Phase Separation.  
735 *Biophysical Journal*, 114(10), 2262–2270. <https://doi.org/10.1016/j.bpj.2018.03.011>
- 736 Farge, G., Laurens, N., Broekmans, O. D., van den Wildenberg, S. M. J. L., Dekker, L. C. M., Gaspari,  
737 M., Gustafsson, C. M., Peterman, E. J. G., Falkenberg, M., & Wuite, G. J. L. (2012). Protein  
738 sliding and DNA denaturation are essential for DNA organization by human mitochondrial  
739 transcription factor A. *Nature Communications*, 3(1), 1013.  
740 <https://doi.org/10.1038/ncomms2001>
- 741 Fisher, G. L., Pastrana, C. L., Higman, V. A., Koh, A., Taylor, J. A., Butterer, A., Craggs, T., Sobott, F.,  
742 Murray, H., Crump, M. P., Moreno-Herrero, F., & Dillingham, M. S. (2017). The structural basis  
743 for dynamic DNA binding and bridging interactions which condense the bacterial centromere.  
744 *ELife*, 6, e28086. <https://doi.org/10.7554/eLife.28086>
- 745 Frattini, C., Promonet, A., Alghoul, E., Vidal-Eychenie, S., Lamarque, M., Blanchard, M.-P., Urbach, S.,  
746 Basbous, J., & Constantinou, A. (2021). TopBP1 assembles nuclear condensates to switch on

747 ATR signaling. *Molecular Cell*, 81(6), 1231-1245.e8.  
748 <https://doi.org/10.1016/j.molcel.2020.12.049>

749 Fudenberg, G., Abdennur, N., Imakaev, M., Goloborodko, A., & Mirny, L. A. (2017). Emerging Evidence  
750 of Chromosome Folding by Loop Extrusion. *Cold Spring Harbor Symposia on Quantitative*  
751 *Biology*, 82, 45–55. <https://doi.org/10.1101/sqb.2017.82.034710>

752 Fudenberg, G., Imakaev, M., Lu, C., Goloborodko, A., Abdennur, N., & Mirny, L. A. (2016). Formation  
753 of Chromosomal Domains by Loop Extrusion. *Cell Reports*, 15(9), 2038–2049.  
754 <https://doi.org/10.1016/j.celrep.2016.04.085>

755 Gallego, L. D., Schneider, M., Mittal, C., Romanauska, A., Gudino Carrillo, R. M., Schubert, T., Pugh,  
756 B. F., & Köhler, A. (2020). Phase separation directs ubiquitination of gene-body nucleosomes.  
757 *Nature*, 579(7800), 592–597. <https://doi.org/10.1038/s41586-020-2097-z>

758 Goloborodko, A., Marko, J. F., & Mirny, L. A. (2016). Chromosome Compaction by Active Loop  
759 Extrusion. *Biophysical Journal*, 110(10), 2162–2168. <https://doi.org/10.1016/j.bpj.2016.02.041>

760 Graham, J. S., Johnson, R. C., & Marko, J. F. (2011). Concentration-dependent exchange accelerates  
761 turnover of proteins bound to double-stranded DNA. *Nucleic Acids Research*, 39(6), 2249–  
762 2259. <https://doi.org/10.1093/nar/gkq1140>

763 Graham, T. G. W., Wang, X., Song, D., Etson, C. M., Oijen, A. M. van, Rudner, D. Z., & Loparo, J. J.  
764 (2014). ParB spreading requires DNA bridging. *Genes & Development*, 28(11), 1228–1238.  
765 <https://doi.org/10.1101/gad.242206.114>

766 Greene, E. C., Wind, S., Fazio, T., Gorman, J., & Visnapuu, M.-L. (2010). DNA Curtains for High-  
767 Throughput Single-Molecule Optical Imaging. *Methods in Enzymology*, 472, 293–315.  
768 [https://doi.org/10.1016/S0076-6879\(10\)72006-1](https://doi.org/10.1016/S0076-6879(10)72006-1)

769 Gruber, S. (2014). Multilayer chromosome organization through DNA bending, bridging and extrusion.  
770 *Current Opinion in Microbiology*, 22, 102–110. <https://doi.org/10.1016/j.mib.2014.09.018>

771 Guacci, V., Koshland, D., & Strunnikov, A. (1997). A Direct Link between Sister Chromatid Cohesion  
772 and Chromosome Condensation Revealed through the Analysis of MCD1 in *S. cerevisiae*. *Cell*,  
773 91(1), 47–57. [https://doi.org/10.1016/S0092-8674\(01\)80008-8](https://doi.org/10.1016/S0092-8674(01)80008-8)

774 Guilhas, B., Walter, J.-C., Rech, J., David, G., Walliser, N. O., Palmeri, J., Mathieu-Demaziere, C.,  
775 Parmeggiani, A., Bouet, J.-Y., Gall, A. L., & Nollmann, M. (2020). ATP-Driven Separation of  
776 Liquid Phase Condensates in Bacteria. *Molecular Cell*, 79(2), 293-303.e4.  
777 <https://doi.org/10.1016/j.molcel.2020.06.034>

778 Gutierrez-Escribano, P., Newton, M. D., Llauró, A., Huber, J., Tanasie, L., Davy, J., Aly, I., Aramayo,  
779 R., Montoya, A., Kramer, H., Stigler, J., Rueda, D. S., & Aragon, L. (2019). A conserved ATP-  
780 and Scc2/4-dependent activity for cohesin in tethering DNA molecules. *Science Advances*,  
781 5(11), eaay6804. <https://doi.org/10.1126/sciadv.aay6804>

782 Haarhuis, J. H. I., van der Weide, R. H., Blomen, V. A., Yáñez-Cuna, J. O., Amendola, M., van Ruiten,  
783 M. S., Krijger, P. H. L., Teunissen, H., Medema, R. H., van Steensel, B., Brummelkamp, T. R.,  
784 de Wit, E., & Rowland, B. D. (2017). The Cohesin Release Factor WAPL Restricts Chromatin  
785 Loop Extension. *Cell*, 169(4), 693-707.e14. <https://doi.org/10.1016/j.cell.2017.04.013>

- 786 Haering, C. H., Farcas, A.-M., Arumugam, P., Metson, J., & Nasmyth, K. (2008). The cohesin ring  
787 concatenates sister DNA molecules. *Nature*, 454(7202), 297–301.  
788 <https://doi.org/10.1038/nature07098>
- 789 Harrington, R. E., & Winicov, I. (1994). New Concepts in Protein-DNA Recognition: Sequence-directed  
790 DNA Bending and Flexibility11A glossary of abbreviations and polynucleotide notation appears  
791 on p. 261. In W. E. Cohn & K. Moldave (Eds.), *Progress in Nucleic Acid Research and Molecular*  
792 *Biology* (Vol. 47, pp. 195–270). Academic Press. [https://doi.org/10.1016/S0079-](https://doi.org/10.1016/S0079-6603(08)60253-6)  
793 [6603\(08\)60253-6](https://doi.org/10.1016/S0079-6603(08)60253-6)
- 794 Higashi, T. L., Eickhoff, P., Simoes, J. S., Locke, J., Nans, A., Flynn, H. R., Snijders, A. P.,  
795 Papageorgiou, G., O'Reilly, N., Chen, Z. A., O'Reilly, F. J., Rappsilber, J., Costa, A., &  
796 Uhlmann, F. (2020). A Structure-Based Mechanism for DNA Entry into the Cohesin Ring.  
797 *BioRxiv*. <https://doi.org/10.1101/2020.04.21.052944>
- 798 Hinshaw, S. M., Makrantonis, V., Kerr, A., Marston, A. L., & Harrison, S. C. (2015). Structural evidence  
799 for Scc4-dependent localization of cohesin loading. *ELife*, 4, e06057.  
800 <https://doi.org/10.7554/eLife.06057>
- 801 Ho, B., Baryshnikova, A., & Brown, G. W. (2018). Unification of Protein Abundance Datasets Yields a  
802 Quantitative *Saccharomyces cerevisiae* Proteome. *Cell Systems*, 6(2), 192-205.e3.  
803 <https://doi.org/10.1016/j.cels.2017.12.004>
- 804 Johnson, R. C., Stella, S., & Heiss, J. K. (2008). Chapter 8: Bending and Compaction of DNA by  
805 Proteins. In *Protein-Nucleic Acid Interactions* (pp. 176–220).  
806 <https://doi.org/10.1039/9781847558268-00176>
- 807 Kappel, C., Zachariae, U., Dölker, N., & Grubmüller, H. (2010). An Unusual Hydrophobic Core Confers  
808 Extreme Flexibility to HEAT Repeat Proteins. *Biophysical Journal*, 99(5), 1596–1603.  
809 <https://doi.org/10.1016/j.bpj.2010.06.032>
- 810 Keenen, M. M., Brown, D., Brennan, L. D., Renger, R., Khoo, H., Carlson, C. R., Huang, B., Grill, S. W.,  
811 Narlikar, G. J., & Redding, S. (2020). HP1 proteins compact DNA into mechanically and  
812 positionally stable phase separated domains. *BioRxiv*, 2020.10.30.362772.  
813 <https://doi.org/10.1101/2020.10.30.362772>
- 814 Kent, S., Brown, K., Yang, C., Alsaihati, N., Tian, C., Wang, H., & Ren, X. (2020). Phase-Separated  
815 Transcriptional Condensates Accelerate Target-Search Process Revealed by Live-Cell Single-  
816 Molecule Imaging. *Cell Reports*, 33(2), 108248. <https://doi.org/10.1016/j.celrep.2020.108248>
- 817 Kikuchi, S., Borek, D. M., Otwinowski, Z., Tomchick, D. R., & Yu, H. (2016). Crystal structure of the  
818 cohesin loader Scc2 and insight into cohesinopathy. *Proceedings of the National Academy of*  
819 *Sciences*, 113(44), 12444–12449. <https://doi.org/10.1073/pnas.1611333113>
- 820 Kilic, S., Lezaja, A., Gatti, M., Bianco, E., Michelena, J., Imhof, R., & Altmeyer, M. (2019). Phase  
821 separation of 53BP1 determines liquid-like behavior of DNA repair compartments. *The EMBO*  
822 *Journal*, 38(16), e101379. <https://doi.org/10.15252/embj.2018101379>
- 823 Kim, H., & Loparo, J. J. (2016). Multistep assembly of DNA condensation clusters by SMC. *Nature*  
824 *Communications*, 7(1), 10200. <https://doi.org/10.1038/ncomms10200>



- 825 Kim, Y., Shi, Z., Zhang, H., Finkelstein, I. J., & Yu, H. (2019). Human cohesin compacts DNA by loop  
826 extrusion. *Science*, 366(6471), 1345–1349. <https://doi.org/10.1126/science.aaz4475>
- 827 Kim, Y., & Yu, H. (2020). Shaping of the 3D genome by the ATPase machine cohesin. *Experimental &*  
828 *Molecular Medicine*, 52(12), 1891–1897. <https://doi.org/10.1038/s12276-020-00526-2>
- 829 Kumar, R., Grosbart, M., Nurse, P., Bahng, S., Wyman, C. L., & Mariani, K. J. (2017). The bacterial  
830 condensin MukB compacts DNA by sequestering supercoils and stabilizing topologically  
831 isolated loops. *The Journal of Biological Chemistry*, 292(41), 16904–16920.  
832 <https://doi.org/10.1074/jbc.M117.803312>
- 833 Kurokawa, Y., & Murayama, Y. (2020). DNA Binding by the Mis4Scc2 Loader Promotes Topological  
834 DNA Entrapment by the Cohesin Ring. *Cell Reports*, 33(6).  
835 <https://doi.org/10.1016/j.celrep.2020.108357>
- 836 Ladouceur, A.-M., Parmar, B. S., Biedzinski, S., Wall, J., Tope, S. G., Cohn, D., Kim, A., Soubry, N.,  
837 Reyes-Lamothe, R., & Weber, S. C. (2020). Clusters of bacterial RNA polymerase are  
838 biomolecular condensates that assemble through liquid–liquid phase separation. *Proceedings*  
839 *of the National Academy of Sciences of the United States of America*, 117(31), 18540–18549.  
840 <https://doi.org/10.1073/pnas.2005019117>
- 841 Lappala, A., & Terentjev, E. M. (2013). “Raindrop” Coalescence of Polymer Chains during Coil–Globule  
842 Transition. *Macromolecules*, 46(3), 1239–1247. <https://doi.org/10.1021/ma302364f>
- 843 Larson, A. G., Elnatan, D., Keenen, M. M., Trnka, M. J., Johnston, J. B., Burlingame, A. L., Agard, D.  
844 A., Redding, S., & Narlikar, G. J. (2017). Liquid droplet formation by HP1 $\alpha$  suggests a role for  
845 phase separation in heterochromatin. *Nature*, 547(7662), 236–240.  
846 <https://doi.org/10.1038/nature22822>
- 847 Madariaga-Marcos, J., Pastrana, C. L., Fisher, G. L., Dillingham, M. S., & Moreno-Herrero, F. (2019).  
848 ParB dynamics and the critical role of the CTD in DNA condensation unveiled by combined  
849 force-fluorescence measurements. *ELife*, 8, e43812. <https://doi.org/10.7554/eLife.43812>
- 850 Mehlich, A., Fang, J., Pelz, B., Li, H., & Stigler, J. (2020). Slow Transition Path Times Reveal a Complex  
851 Folding Barrier in a Designed Protein. *Frontiers in Chemistry*, 8, 1103.  
852 <https://doi.org/10.3389/fchem.2020.587824>
- 853 Mészáros, B., Erdős, G., & Dosztányi, Z. (2018). IUPred2A: Context-dependent prediction of protein  
854 disorder as a function of redox state and protein binding. *Nucleic Acids Research*, 46(W1),  
855 W329–W337. <https://doi.org/10.1093/nar/gky384>
- 856 Michaelis, C., Ciosk, R., & Nasmyth, K. (1997). Cohesins: Chromosomal Proteins that Prevent  
857 Premature Separation of Sister Chromatids. *Cell*, 91(1), 35–45. [https://doi.org/10.1016/S0092-8674\(01\)80007-6](https://doi.org/10.1016/S0092-8674(01)80007-6)
- 859 Minamino, M., Higashi, T. L., Bouchoux, C., & Uhlmann, F. (2018). Topological in vitro loading of the  
860 budding yeast cohesin ring onto DNA. *Life Science Alliance*, 1(5).  
861 <https://doi.org/10.26508/lsa.201800143>
- 862 Minnen, A., Attaiech, L., Thon, M., Gruber, S., & Veening, J.-W. (2011). SMC is recruited to oriC by  
863 ParB and promotes chromosome segregation in *Streptococcus pneumoniae*. *Molecular*  
864 *Microbiology*, 81(3), 676–688. <https://doi.org/10.1111/j.1365-2958.2011.07722.x>

- 865 Mitrea, D. M., Chandra, B., Ferrolino, M. C., Gibbs, E. B., Tolbert, M., White, M. R., & Kriwacki, R. W.  
866 (2018). Methods for Physical Characterization of Phase-Separated Bodies and Membrane-less  
867 Organelles. *Journal of Molecular Biology*, 430(23), 4773–4805.  
868 <https://doi.org/10.1016/j.jmb.2018.07.006>
- 869 Morin, J. A., Wittmann, S., Choubey, S., Klosin, A., Golfier, S., Hyman, A. A., Jülicher, F., & Grill, S. W.  
870 (2020). Surface condensation of a pioneer transcription factor on DNA. *BioRxiv*,  
871 2020.09.24.311712. <https://doi.org/10.1101/2020.09.24.311712>
- 872 Murayama, Y., & Uhlmann, F. (2014). Biochemical reconstitution of topological DNA binding by the  
873 cohesin ring. *Nature*, 505(7483), 367–371. <https://doi.org/10.1038/nature12867>
- 874 Oudet, P., Gross-Bellard, M., & Chambon, P. (1975). Electron microscopic and biochemical evidence  
875 that chromatin structure is a repeating unit. *Cell*, 4(4), 281–300. [https://doi.org/10.1016/0092-](https://doi.org/10.1016/0092-8674(75)90149-x)  
876 [8674\(75\)90149-x](https://doi.org/10.1016/0092-8674(75)90149-x)
- 877 Parker, M. W., Bell, M., Mir, M., Kao, J. A., Darzacq, X., Botchan, M. R., & Berger, J. M. (2019). A new  
878 class of disordered elements controls DNA replication through initiator self-assembly. *ELife*, 8,  
879 e48562. <https://doi.org/10.7554/eLife.48562>
- 880 Petela, N. J., Gligoris, T. G., Metson, J., Lee, B.-G., Voulgaris, M., Hu, B., Kikuchi, S., Chapard, C.,  
881 Chen, W., Rajendra, E., Srinivisan, M., Yu, H., Löwe, J., & Nasmyth, K. A. (2018). Scc2 Is a  
882 Potent Activator of Cohesin's ATPase that Promotes Loading by Binding Scc1 without Pds5.  
883 *Molecular Cell*, 70(6), 1134-1148.e7. <https://doi.org/10.1016/j.molcel.2018.05.022>
- 884 Pombo, A., & Dillon, N. (2015). Three-dimensional genome architecture: Players and mechanisms.  
885 *Nature Reviews Molecular Cell Biology*, 16(4), 245–257. <https://doi.org/10.1038/nrm3965>
- 886 Pope, B. D., Ryba, T., Dileep, V., Yue, F., Wu, W., Denas, O., Vera, D. L., Wang, Y., Hansen, R. S.,  
887 Canfield, T. K., Thurman, R. E., Cheng, Y., Gülsoy, G., Dennis, J. H., Snyder, M. P.,  
888 Stamatoyannopoulos, J. A., Taylor, J., Hardison, R. C., Kahveci, T., ... Gilbert, D. M. (2014).  
889 Topologically associating domains are stable units of replication-timing regulation. *Nature*,  
890 515(7527), 402–405. <https://doi.org/10.1038/nature13986>
- 891 Quail, T., Golfier, S., Elsner, M., Ishihara, K., Jülicher, F., & Brugués, J. (2020). Capillary forces drive  
892 pioneer transcription factor-mediated DNA condensation. *BioRxiv*, 2020.09.17.302299.  
893 <https://doi.org/10.1101/2020.09.17.302299>
- 894 Rao, S. S. P., Huang, S.-C., Hilaire, B. G. S., Engreitz, J. M., Perez, E. M., Kieffer-Kwon, K.-R., Sanborn,  
895 A. L., Johnstone, S. E., Bascom, G. D., Bochkov, I. D., Huang, X., Shamim, M. S., Shin, J.,  
896 Turner, D., Ye, Z., Omer, A. D., Robinson, J. T., Schlick, T., Bernstein, B. E., ... Aiden, E. L.  
897 (2017). Cohesin Loss Eliminates All Loop Domains. *Cell*, 171(2), 305-320.e24.  
898 <https://doi.org/10.1016/j.cell.2017.09.026>
- 899 Razin, S. V., & Ulianov, S. V. (2020). Divide and Rule: Phase Separation in Eukaryotic Genome  
900 Functioning. *Cells*, 9(11). <https://doi.org/10.3390/cells9112480>
- 901 Renger, R., Morin, J. A., Lemaitre, R., Ruer-Gruss, M., Jülicher, F., Hermann, A., & Grill, S. W. (2021).  
902 Co-condensation of proteins with single- and double-stranded DNA. *BioRxiv*,  
903 2021.03.17.435834. <https://doi.org/10.1101/2021.03.17.435834>

- 904 Rhodes, J., Mazza, D., Nasmyth, K., & Uphoff, S. (2017). Scc2/Nipbl hops between chromosomal  
905 cohesin rings after loading. *ELife*, 6, e30000. <https://doi.org/10.7554/eLife.30000>
- 906 Ryu, J.-K., Bouchoux, C., Liu, H. W., Kim, E., Minamino, M., Groot, R. de, Katan, A. J., Bonato, A.,  
907 Marenduzzo, D., Michieletto, D., Uhlmann, F., & Dekker, C. (2021). Bridging-induced phase  
908 separation induced by cohesin SMC protein complexes. *Science Advances*, 7(7), eabe5905.  
909 <https://doi.org/10.1126/sciadv.abe5905>
- 910 Sabari, B. R., Dall'Agnese, A., Boija, A., Klein, I. A., Coffey, E. L., Shrinivas, K., Abraham, B. J., Hannett,  
911 N. M., Zamudio, A. V., Manteiga, J. C., Li, C. H., Guo, Y. E., Day, D. S., Schuijers, J., Vasile,  
912 E., Malik, S., Hnisz, D., Lee, T. I., Cisse, I. I., ... Young, R. A. (2018). Coactivator condensation  
913 at super-enhancers links phase separation and gene control. *Science (New York, N.Y.)*,  
914 361(6400). <https://doi.org/10.1126/science.aar3958>
- 915 Shendruk, T. N., Bertrand, M., de Haan, H. W., Harden, J. L., & Slater, G. W. (2015). Simulating the  
916 Entropic Collapse of Coarse-Grained Chromosomes. *Biophysical Journal*, 108(4), 810–820.  
917 <https://doi.org/10.1016/j.bpj.2014.11.3487>
- 918 Shi, Z., Gao, H., Bai, X., & Yu, H. (2020). Cryo-EM structure of the human cohesin-NIPBL-DNA  
919 complex. *Science*, 368(6498), 1454–1459. <https://doi.org/10.1126/science.abb0981>
- 920 Skibbens, R. V. (2000). Holding Your Own: Establishing Sister Chromatid Cohesion. *Genome*  
921 *Research*, 10(11), 1664–1671. <https://doi.org/10.1101/gr.153600>
- 922 Song, D., Graham, T. G. W., & Loparo, J. J. (2016). A general approach to visualize protein binding and  
923 DNA conformation without protein labelling. *Nature Communications*, 7(1), 10976.  
924 <https://doi.org/10.1038/ncomms10976>
- 925 Srinivasan, M., Petela, N. J., Scheinost, J. C., Collier, J., Voulgaris, M., B Roig, M., Beckouët, F., Hu,  
926 B., & Nasmyth, K. A. (2019). Scc2 counteracts a Wapl-independent mechanism that releases  
927 cohesin from chromosomes during G1. *ELife*, 8, e44736. <https://doi.org/10.7554/eLife.44736>
- 928 Stigler, J., Çamdere, G. Ö., Koshland, D. E., & Greene, E. C. (2016). Single-Molecule Imaging Reveals  
929 a Collapsed Conformational State for DNA-Bound Cohesin. *Cell Reports*, 15(5), 988–998.  
930 <https://doi.org/10.1016/j.celrep.2016.04.003>
- 931 Strom, A. R., Emelyanov, A. V., Mir, M., Fyodorov, D. V., Darzacq, X., & Karpen, G. H. (2017). Phase  
932 separation drives heterochromatin domain formation. *Nature*, 547(7662), 241–245.  
933 <https://doi.org/10.1038/nature22989>
- 934 Sullivan, N. L., Marquis, K. A., & Rudner, D. Z. (2009). Recruitment of SMC to the origin by ParB-parS  
935 organizes the origin and promotes efficient chromosome segregation. *Cell*, 137(4), 697–707.  
936 <https://doi.org/10.1016/j.cell.2009.04.044>
- 937 Szabo, Q., Bantignies, F., & Cavalli, G. (2019). Principles of genome folding into topologically  
938 associating domains. *Science Advances*, 5(4), eaaw1668.  
939 <https://doi.org/10.1126/sciadv.aaw1668>
- 940 Taylor, J. A., Pastrana, C. L., Butterer, A., Pernstich, C., Gwynn, E. J., Sobott, F., Moreno-Herrero, F.,  
941 & Dillingham, M. S. (2015). Specific and non-specific interactions of ParB with DNA:  
942 Implications for chromosome segregation. *Nucleic Acids Research*, 43(2), 719–731.  
943 <https://doi.org/10.1093/nar/gku1295>

- 944 Verdile, V., De Paola, E., & Paronetto, M. P. (2019). Aberrant Phase Transitions: Side Effects and Novel  
945 Therapeutic Strategies in Human Disease. *Frontiers in Genetics*, 10.  
946 <https://doi.org/10.3389/fgene.2019.00173>
- 947 Wang, M. D., Yin, H., Landick, R., Gelles, J., & Block, S. M. (1997). Stretching DNA with optical  
948 tweezers. *Biophysical Journal*, 72(3), 1335–1346. <https://doi.org/10.1016/S0006->  
949 [3495\(97\)78780-0](https://doi.org/10.1016/S0006-3495(97)78780-0)
- 950 Wei, M.-T., Chang, Y.-C., Shimobayashi, S. F., Shin, Y., Strom, A. R., & Brangwynne, C. P. (2020).  
951 Nucleated transcriptional condensates amplify gene expression. *Nature Cell Biology*, 22(10),  
952 1187–1196. <https://doi.org/10.1038/s41556-020-00578-6>
- 953 Yoshimura, S. H., & Hirano, T. (2016). HEAT repeats – versatile arrays of amphiphilic helices working  
954 in crowded environments? *Journal of Cell Science*, 129(21), 3963–3970.  
955 <https://doi.org/10.1242/jcs.185710>
- 956 Yoshimura, S. H., Hizume, K., Murakami, A., Sutani, T., Takeyasu, K., & Yanagida, M. (2002).  
957 Condensin Architecture and Interaction with DNA: Regulatory Non-SMC Subunits Bind to the  
958 Head of SMC Heterodimer. *Current Biology*, 12(6), 508–513. <https://doi.org/10.1016/S0960->  
959 [9822\(02\)00719-4](https://doi.org/10.1016/S0960-9822(02)00719-4)
- 960 Zhang, N., Kuznetsov, S. G., Sharan, S. K., Li, K., Rao, P. H., & Pati, D. (2008). A handcuff model for  
961 the cohesin complex. *The Journal of Cell Biology*, 183(6), 1019–1031.  
962 <https://doi.org/10.1083/jcb.200801157>
- 963 Zhou, H., Song, Z., Zhong, S., Zuo, L., Qi, Z., Qu, L.-J., & Lai, L. (2019). Mechanism of DNA-Induced  
964 Phase Separation for Transcriptional Repressor VRN1. *Angewandte Chemie International*  
965 *Edition*, 58(15), 4858–4862. <https://doi.org/10.1002/anie.201810373>
- 966 Zuilkoski, C. M., & Skibbens, R. V. (2020). PCNA promotes context-specific sister chromatid cohesion  
967 establishment separate from that of chromatin condensation. *Cell Cycle*, 19(19), 2436–2450.  
968 <https://doi.org/10.1080/15384101.2020.1804221>
- 969 Zuo, L., Zhang, G., Massett, M., Cheng, J., Guo, Z., Wang, L., Gao, Y., Li, R., Huang, X., Li, P., & Qi,  
970 Z. (2021). Loci-specific phase separation of FET fusion oncoproteins promotes gene  
971 transcription. *Nature Communications*, 12(1), 1491. <https://doi.org/10.1038/s41467-021->  
972 [21690-7](https://doi.org/10.1038/s41467-021-21690-7)
- 973
- 974

975 **Supplementary Figures**

976

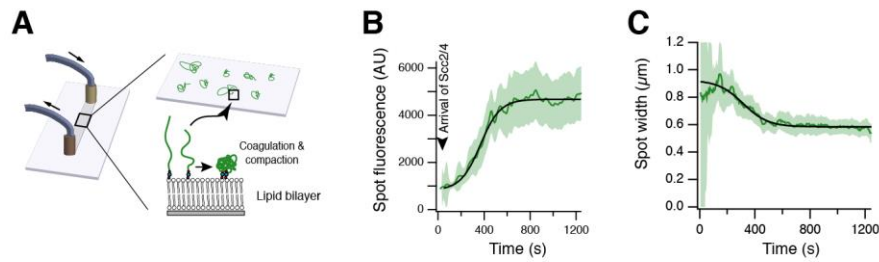

977

978 **Figure S1.** Scc2/4-mediated DNA compaction over time. (A) Scheme of flow cell set-up and DNA diffusion on lipid  
 979 bilayer. (B) Fluorescence intensity of freely diffusing DNA spots over time. (C) Change in width of freely diffusing  
 980 DNA spots over time. (B+C) Dark green curve shows the average of 154 DNA molecules, shading represents 95  
 981 % confidence interval.

982

983

984

985

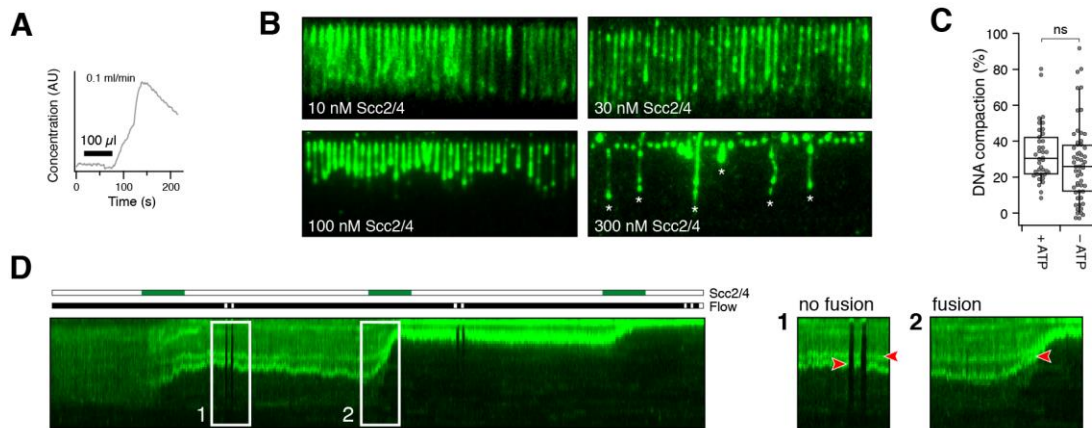

986

987 **Figure S2.** DNA compaction details. (A) Injection profile of 50 μl blue dextran with 0.1 ml/min flow measured by  
 988 change in absorption. Sample arrives after ~120s in the flow cell, maximum sample concentration: ~150 s after  
 989 injection. (B) DNA curtain experiments of different concentrations of unlabeled Scc2/4 at 50 mM NaCl to visualize  
 990 differences in compaction. At 300 nM Scc2/4 some DNA strands are tethered to the lipid surface (asterisks), which  
 991 were excluded from the analysis. (C) DNA compaction mediated by 30 nM Scc2/4 at 50 mM NaCl in presence or  
 992 absence of 0.5 mM ATP. The means are similar according to student's t-test (p-value = 0.175),  $n_{(+ATP)}=38$ ,  
 993  $n_{(-ATP)}=55$ . (D) Pulsed injection of 3x 50 μl 30 nM Scc2/4. Box 1: Condensates stay separate in absence of Scc2/4  
 994 even when the flow is stopped. Box 2: Condensates fuse when free Scc2/4 is present in the flow cell.

995

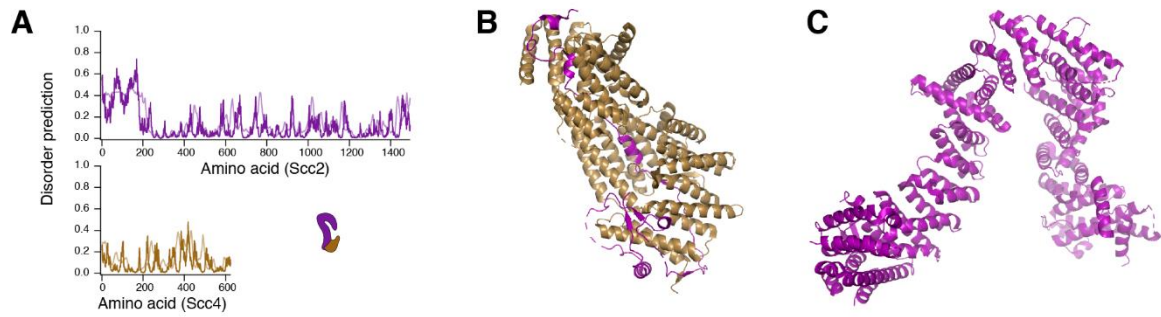

996

997 **Figure S3.** Structural insights into Scc2/4 complex. **(A)** Disorder prediction for Scc2/4 by IUPred2 (dark shading)  
998 and ANCHOR2 (light shading) (Mészáros et al., 2018) **(B)** Crystal structure of Scc4 in complex with Scc2(1-181),  
999 PDB: 4XDN (Hinshaw et al., 2015). The N-terminal unstructured domain of Scc2 is stabilized by Scc4. **(C)** Crystal  
1000 structure of Scc2(127-1493), PDB: 5ME3 (Chao et al., 2017).

1001

1002

1003

1004

1005

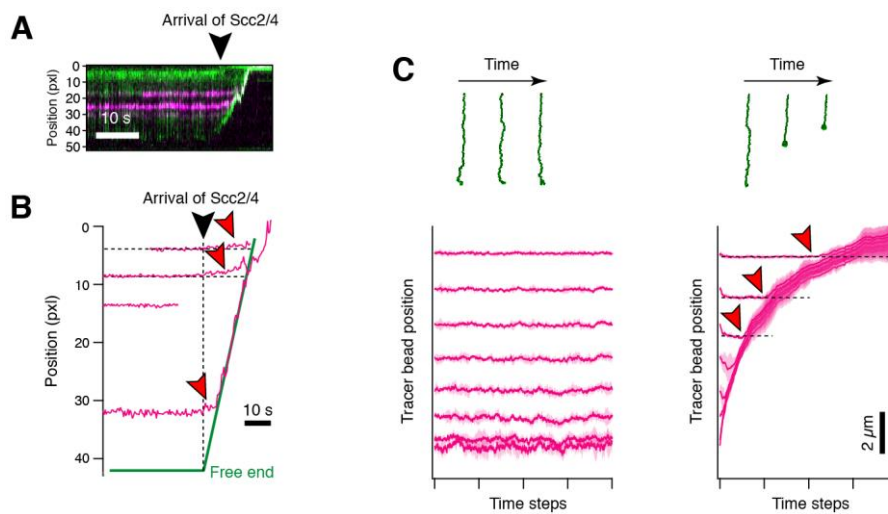

1006

1007 **Figure S4.** Internal DNA compaction. **(A)** Representative kymogram of Scc2/4-mediated DNA compaction with two  
1008 EcoRI-E111Q tracer proteins (magenta) bound. **(B)** Tracked positions of tracer proteins upon Scc2/4 addition. The  
1009 red arrows show movement of internal tracers distant from the condensing end. **(C)** Coarse-grained molecular  
1010 dynamics simulations. Lambda DNA was represented with a Rouse model of 160 beads that were connected by  
1011 segment lengths of ~300 bp. Flow-stretching force was applied. Left: naked DNA, DNA is not compacted over time.  
1012 Right: DNA with Scc2/4, which was modeled by introducing an attractive Lennard-Jones-like potential between the  
1013 beads, DNA is compacted over time. Red arrows indicate the internal beads, which, unlike in experimental data  
1014 (see **(C)**), do not move. Shaded areas indicate the standard deviation of triplicate simulation runs.

1015

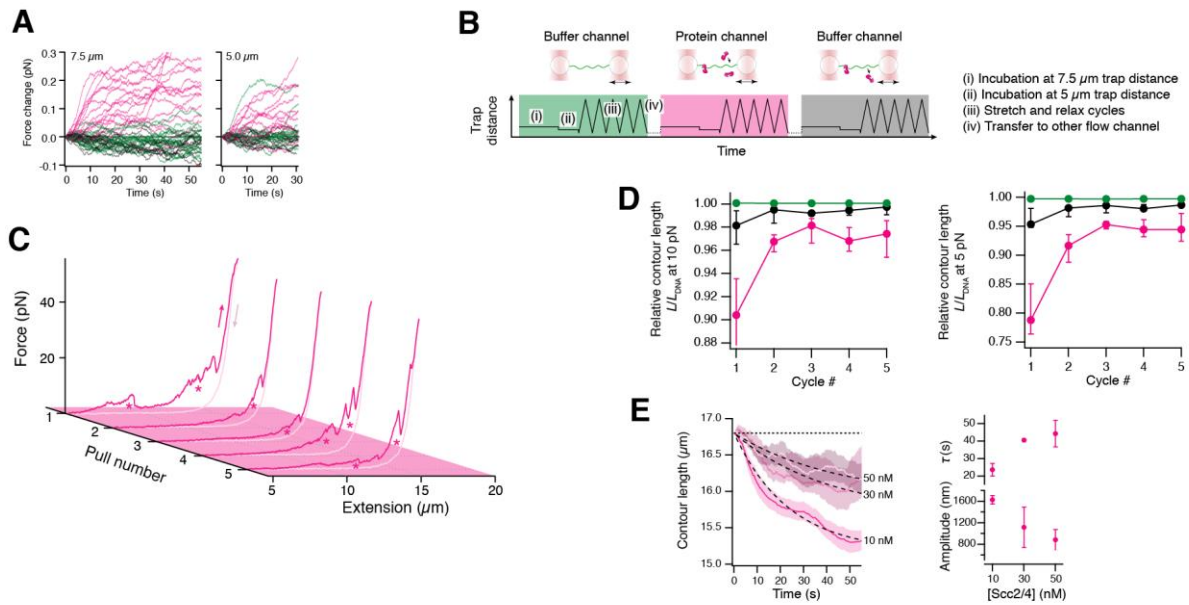

1016

1017 **Figure S5.** DNA compaction studied by optical tweezers. (A) Individual transient force responses of 15 lambda  
 1018 DNA molecules held at constant trap separation at the indicated initial forces. Green: without Scc2/4. Magenta:  
 1019 with 10 nM Scc2/4. Black: buffer wash after initial incubation with Scc2/4. Cf. Fig. 5A. (B) Experimental workflow.  
 1020 (C) Subsequent pulls of lambda DNA in a channel with 10 nM Scc2/4. The characteristic sawtooth pattern reforms  
 1021 in every cycle, observed compaction is marked by asterisks. (D) Relative compaction of tethers, as a function of  
 1022 pulling cycles. As loop formation is not instantaneous, the first cycle is significantly more compacted than the  
 1023 subsequent ones. (E) Time-dependent reduction of the tether contour length hold at 7.5  $\mu\text{m}$  at different protein  
 1024 concentrations. Magenta traces represent averages. Dashed lines are fits to an exponential. Right: Amplitude and  
 1025 time constant of the exponential decrease in contour length.

1026

1027

1028

1029

1030

1031

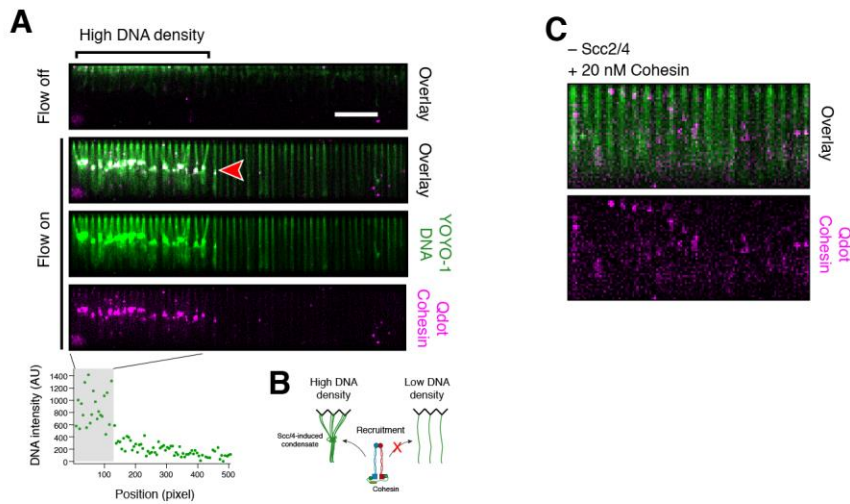

1032

1033 **Figure S6.** Cohesin binding behavior on DNA curtains. **(A)** 2 nM Qdot-labeled cohesin (magenta) and 8 nM Scc2/4  
1034 (dark) were applied simultaneously to single tethered DNA curtains (green) with a flow of 0.3 ml/min followed by  
1035 incubation for 5 min without flow. Cohesin loading occurred primarily at dense DNA clusters created by Scc2/4-  
1036 mediated condensation. DNA density was determined by fluorescence intensity. **(B)** Model for cohesin recruitment  
1037 to Scc2/4-DNA co-condensates. **(C)** DNA curtain experiment without Scc2/4. 20 nM Qdot-labeled cohesin  
1038 (magenta) were applied to single tethered DNA curtains (green) under continuous flow of 0.1 ml/min. Only few  
1039 binding events occurred.
